# Supplementary material
Source: PubMed Central journal article supplement (PMC2736341)

## Chiral HPLC chromatographs for 18 and 24

*rac*-18:

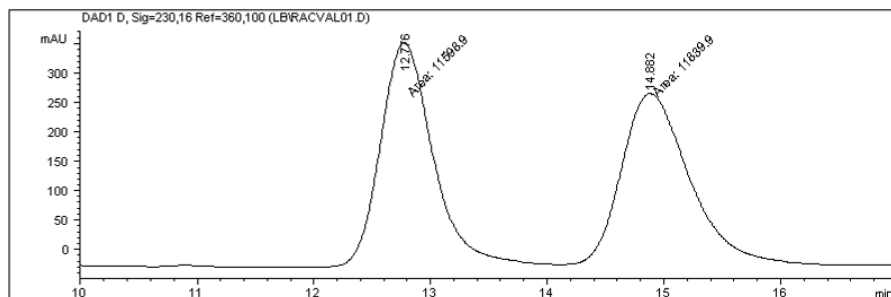

18 (94:6 *er*):

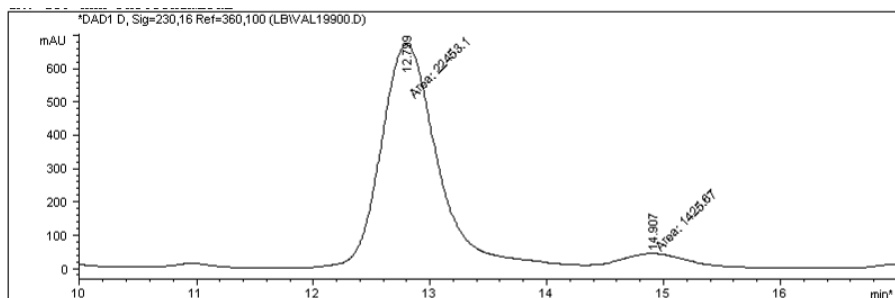

*rac*-24:

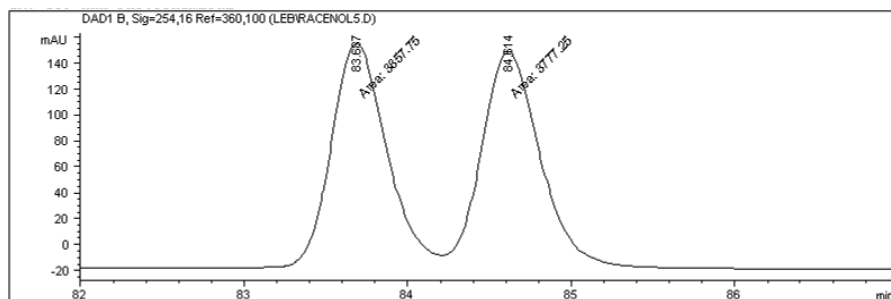

24 (99% ee after one recrystallization of 22):

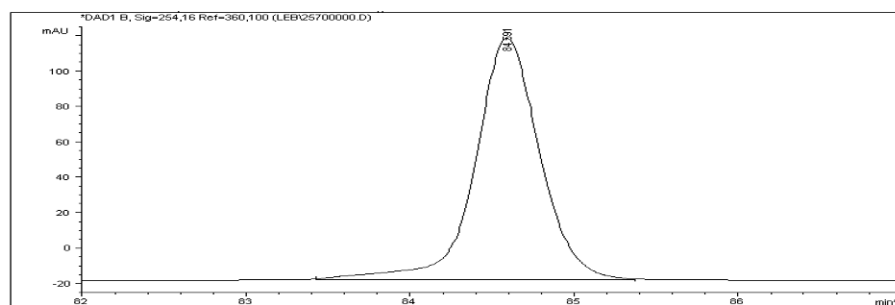

## Stereochemical analysis of 17

Enantiomeric ratio is estimated by comparative integration of dimethyl signals following derivatization

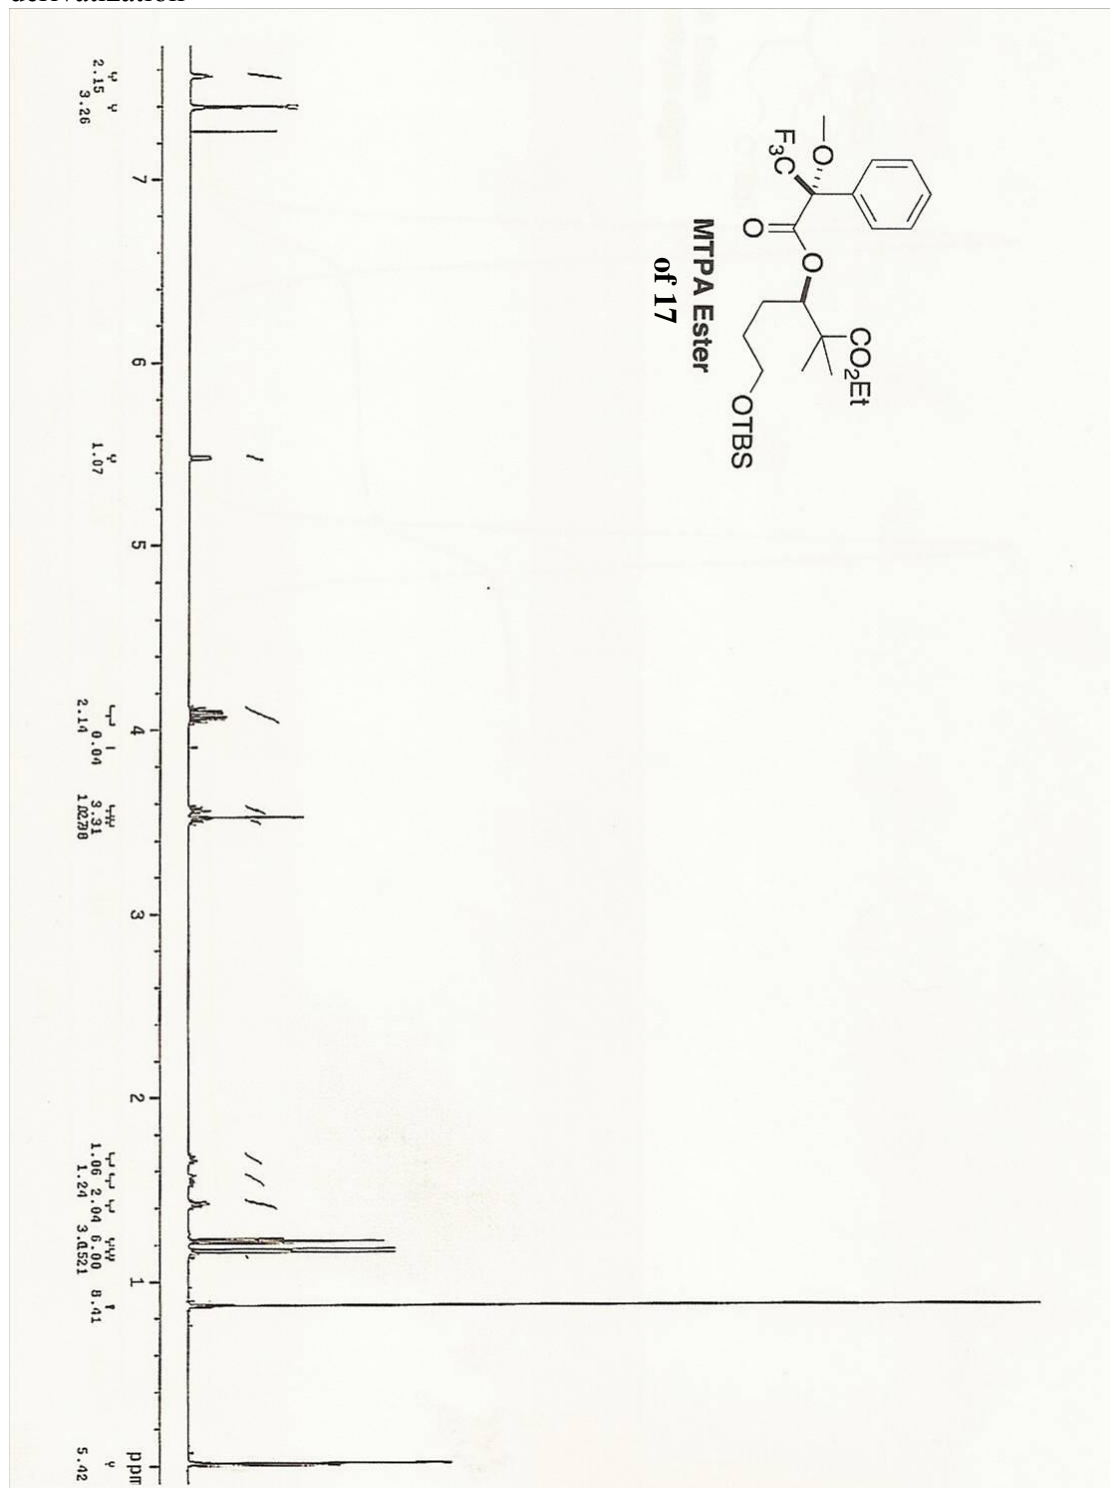

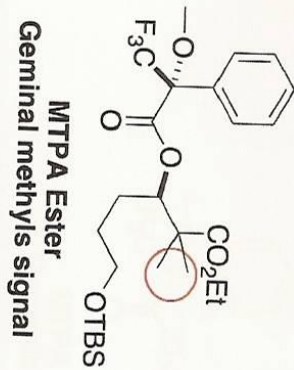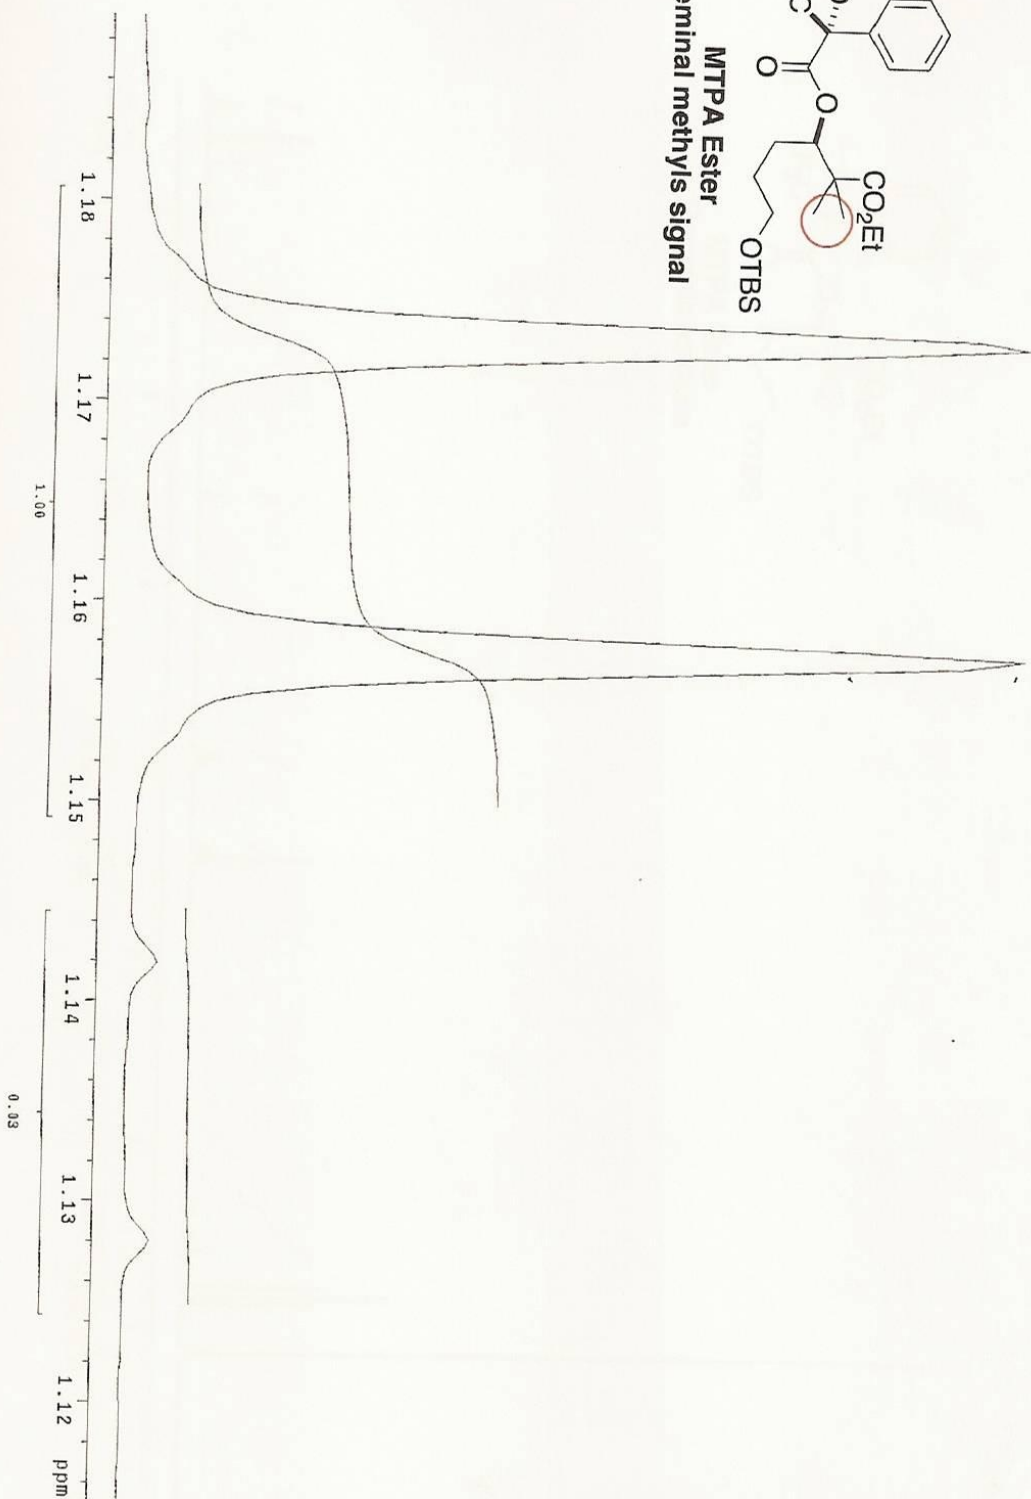

$^1\text{H}$ ,  $^{13}\text{C}$  NMR spectra for all new compounds

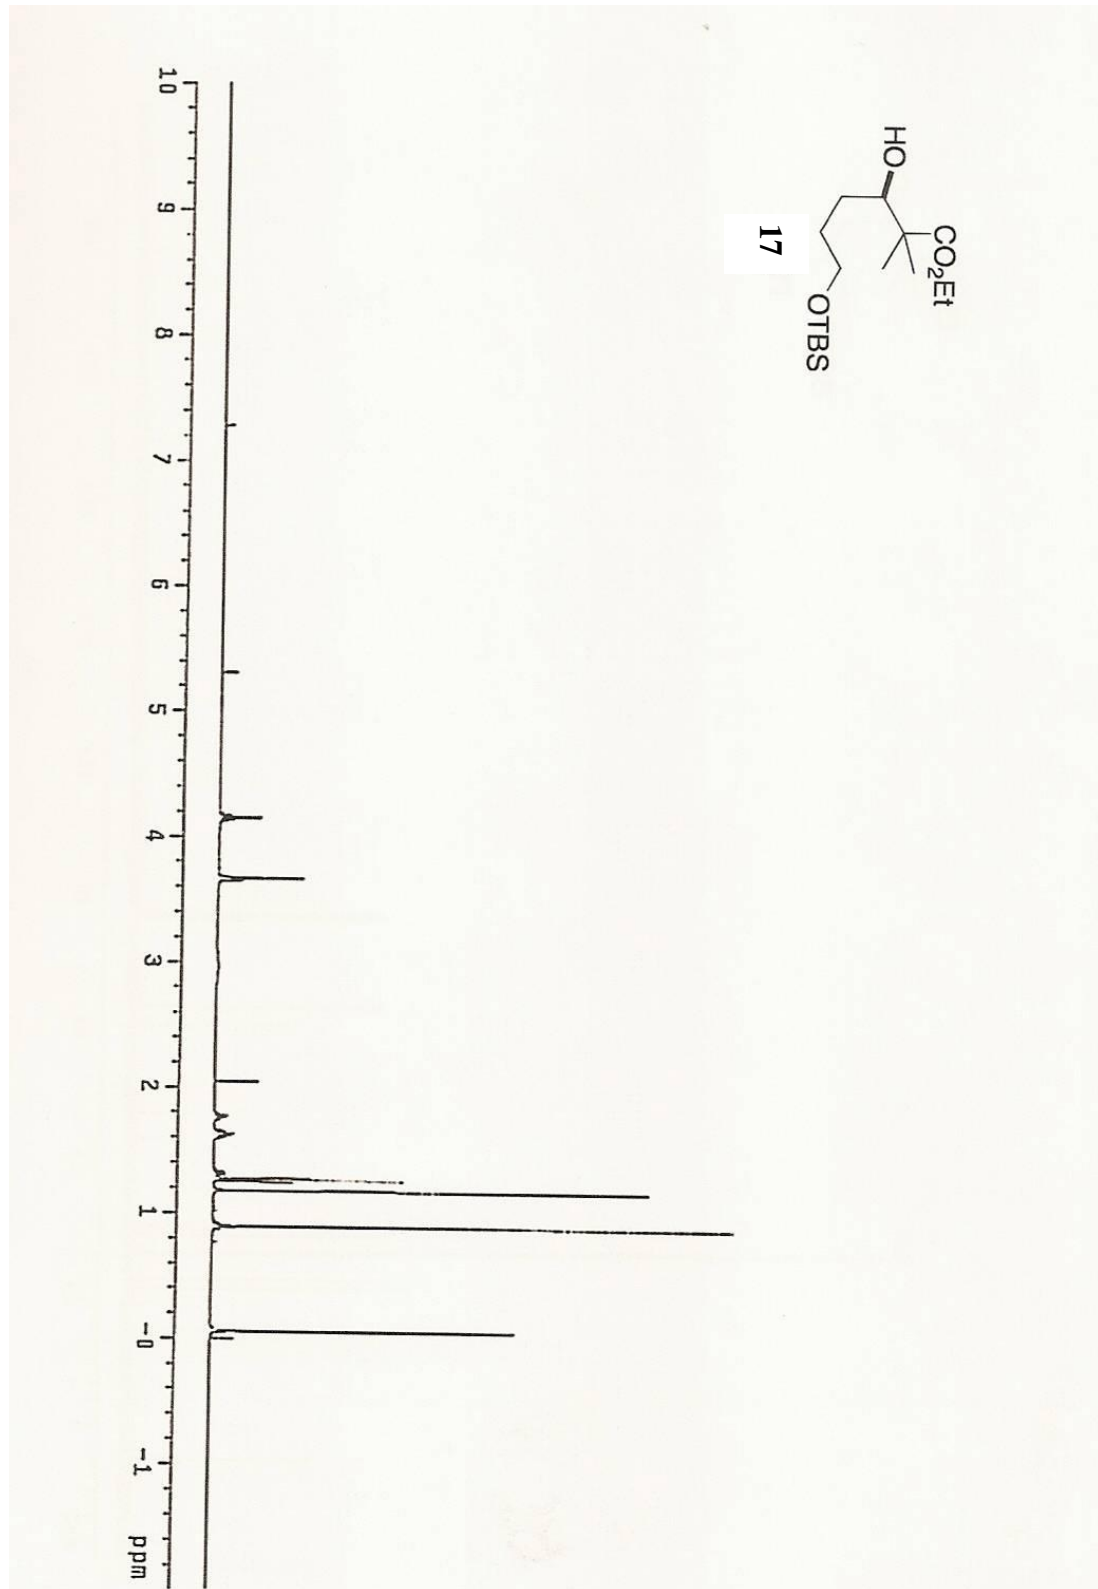

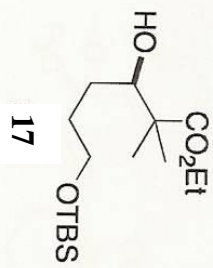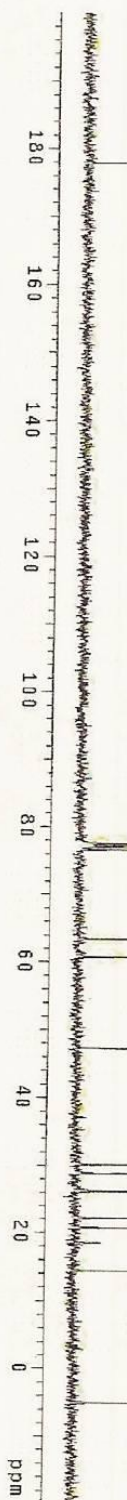

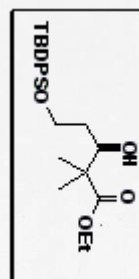

18

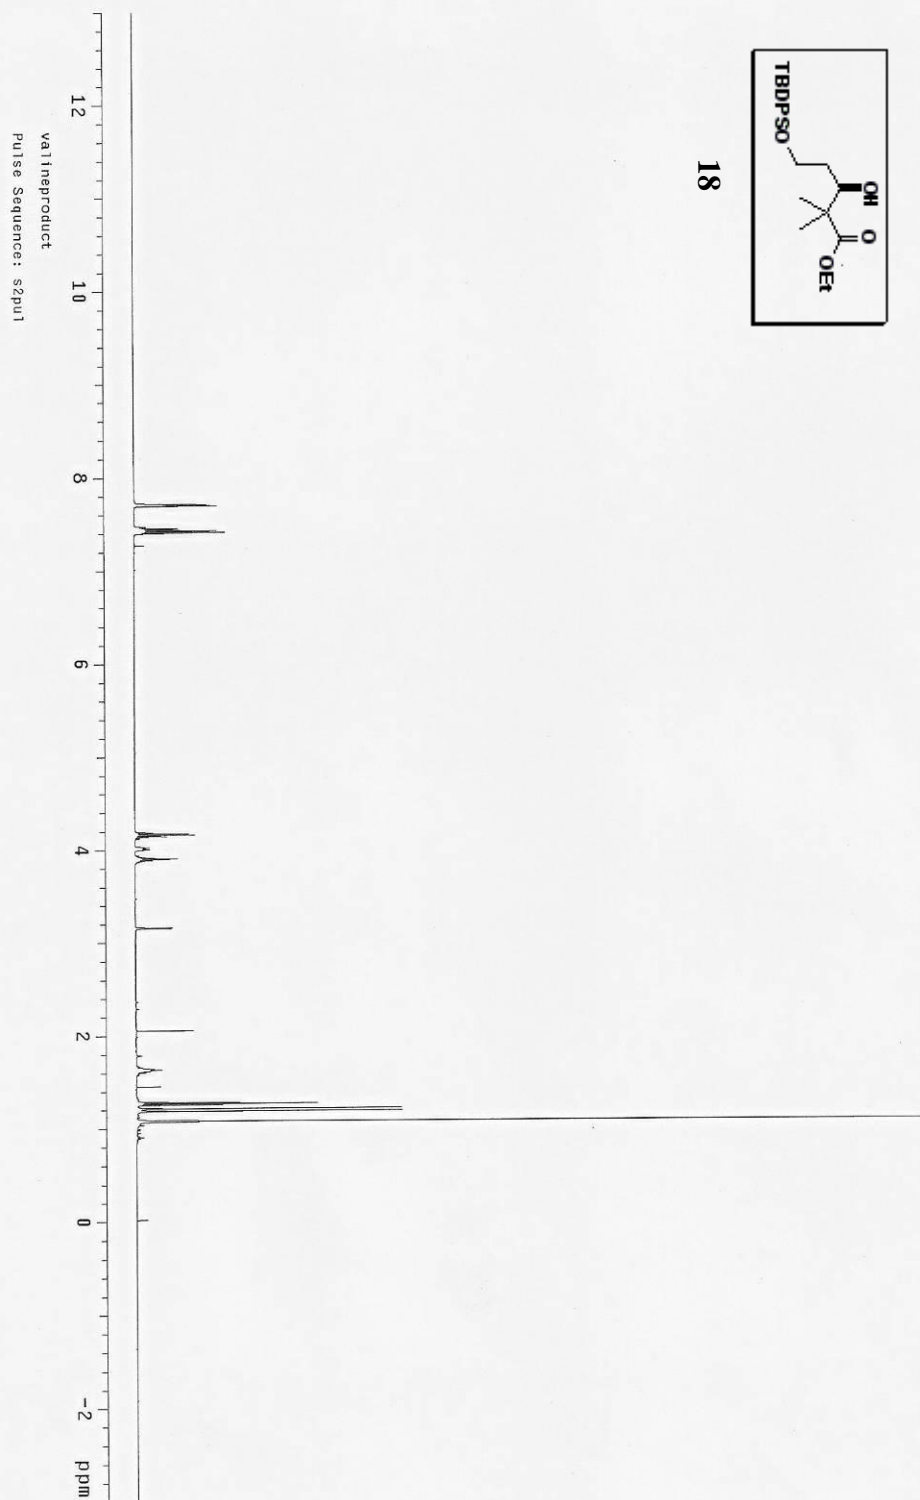

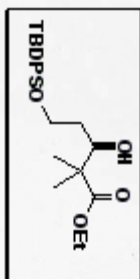

18

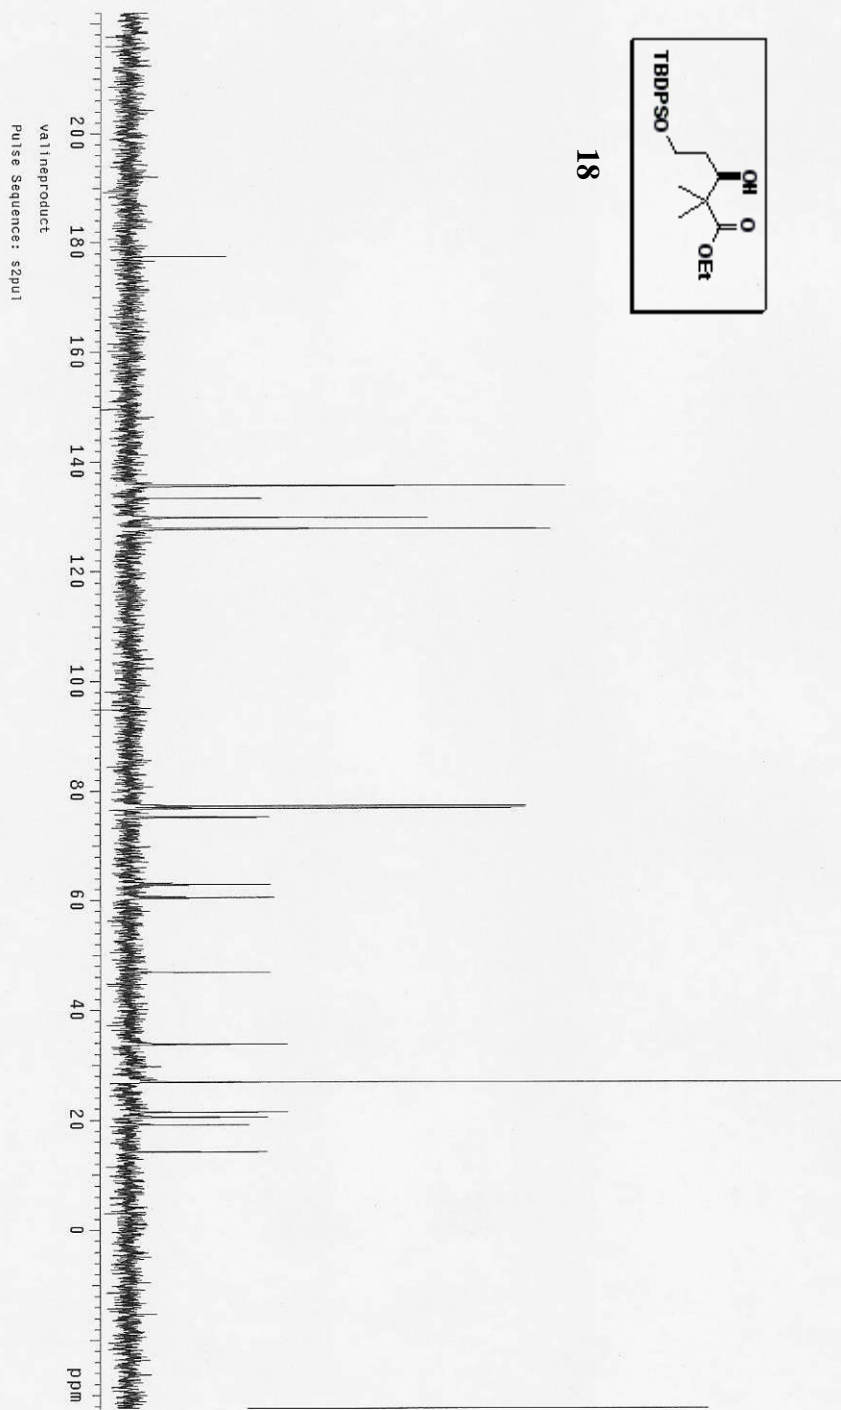

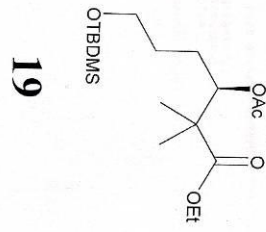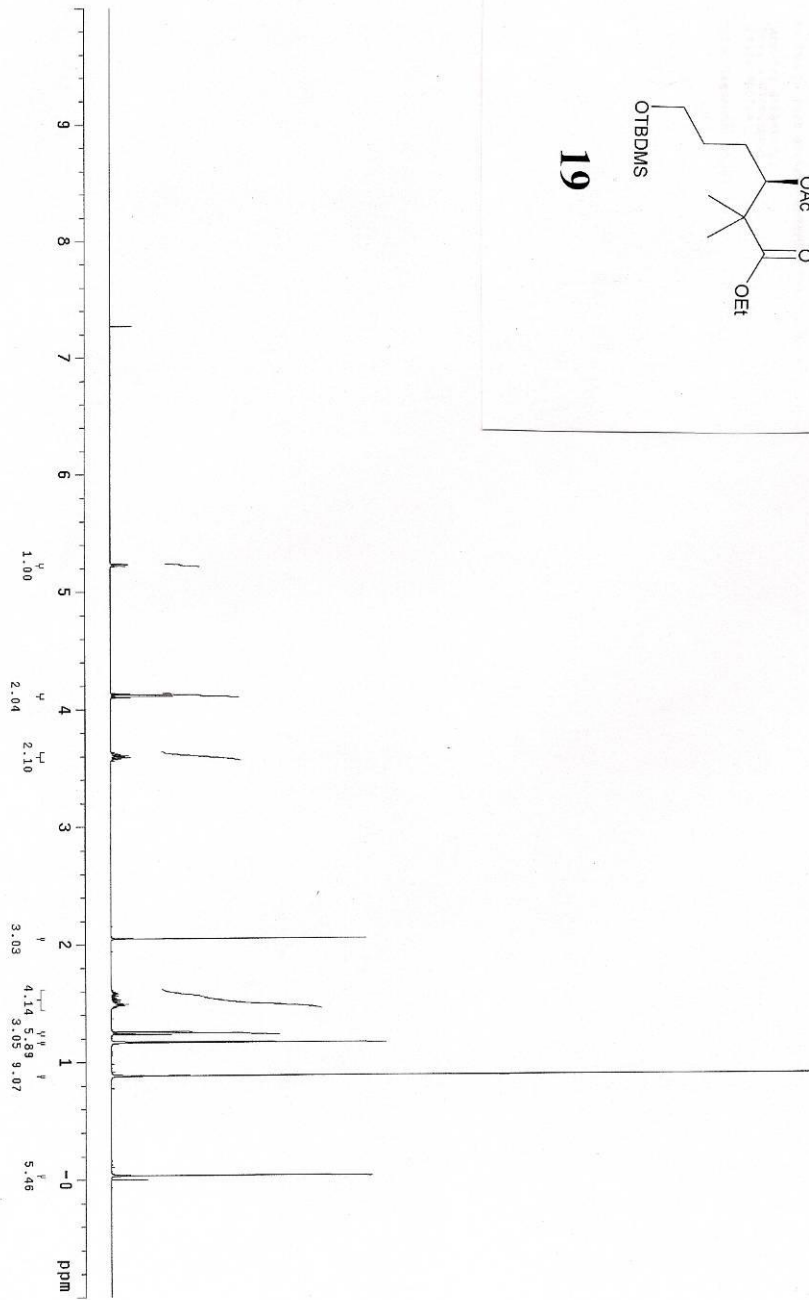



YL-86-199-207-226 fr. 9-18 acetate compound 9-19-05  
 Pulse Sequence: s2pul  
 Solvent: cdcl3  
 Temp: 25.0 C / 298.1 K  
 User: L-14-87 "nightmare"  
 UTRIPus-300 "nightmare"  
 Relax. delay 1.000 sec  
 Pulse delay 0.000 sec  
 Acq time 0.250 sec  
 Width 3200.0 Hz  
 240 Repetitions  
 OBSERVE C13, 125.561114 MHz  
 DECOUPLE H1, 499.3504248 MHz  
 Power 48 db  
 or during acquisition  
 or during relaxation  
 WAIT-16 modulated  
 DATA PROCESSING  
 Line broadening 3.0 Hz  
 FT size 32768  
 Total time 39 hr, 1 min, 30 sec

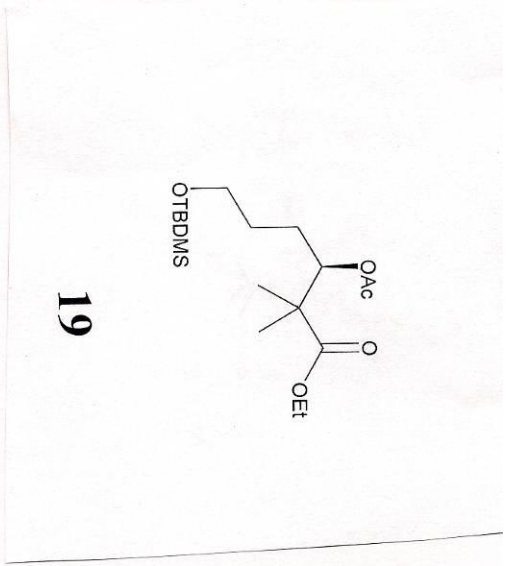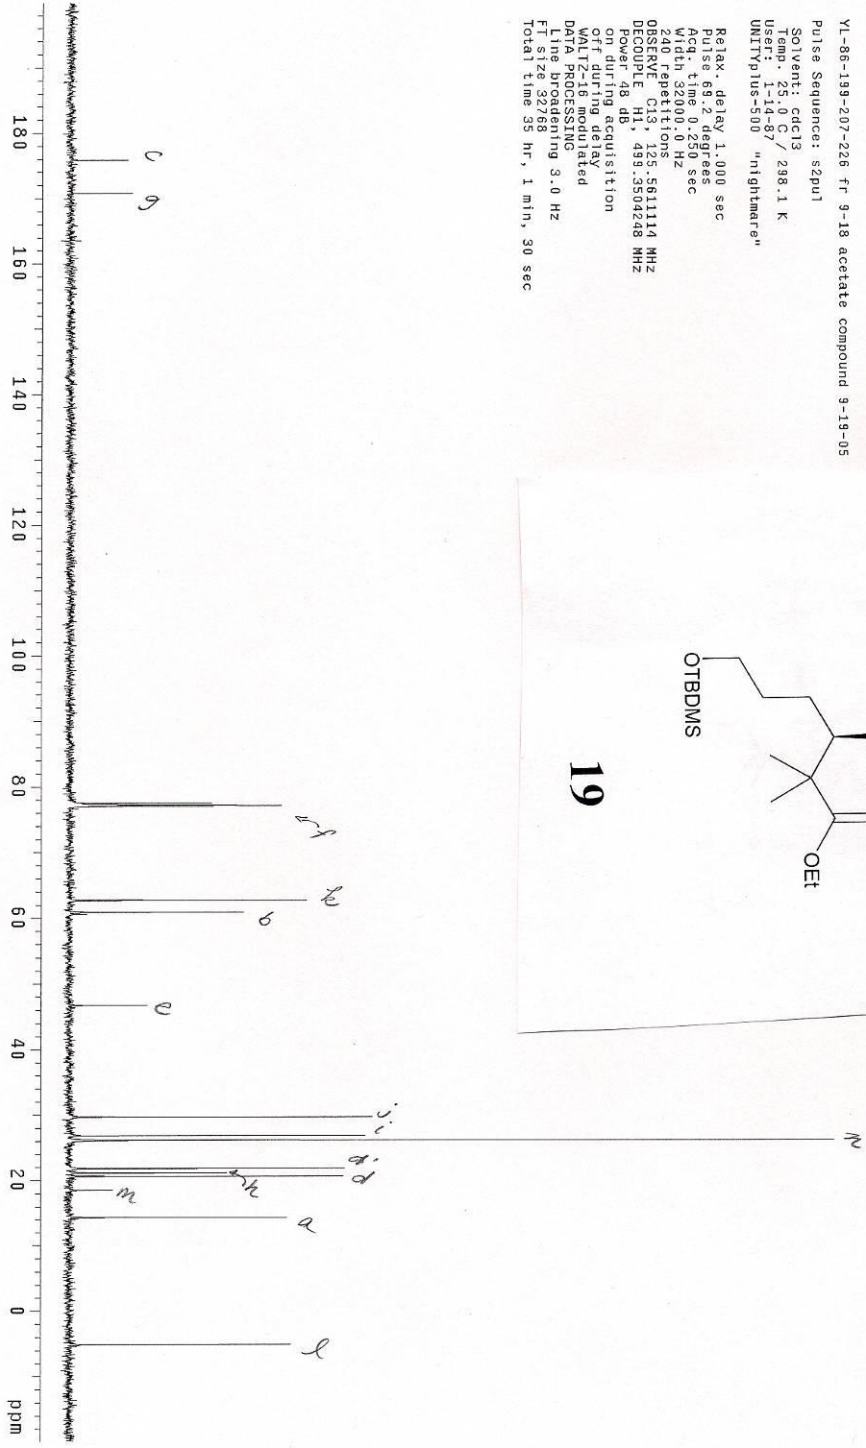

acetate  
Pulse Sequence: s2pu1

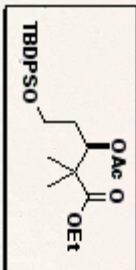

20

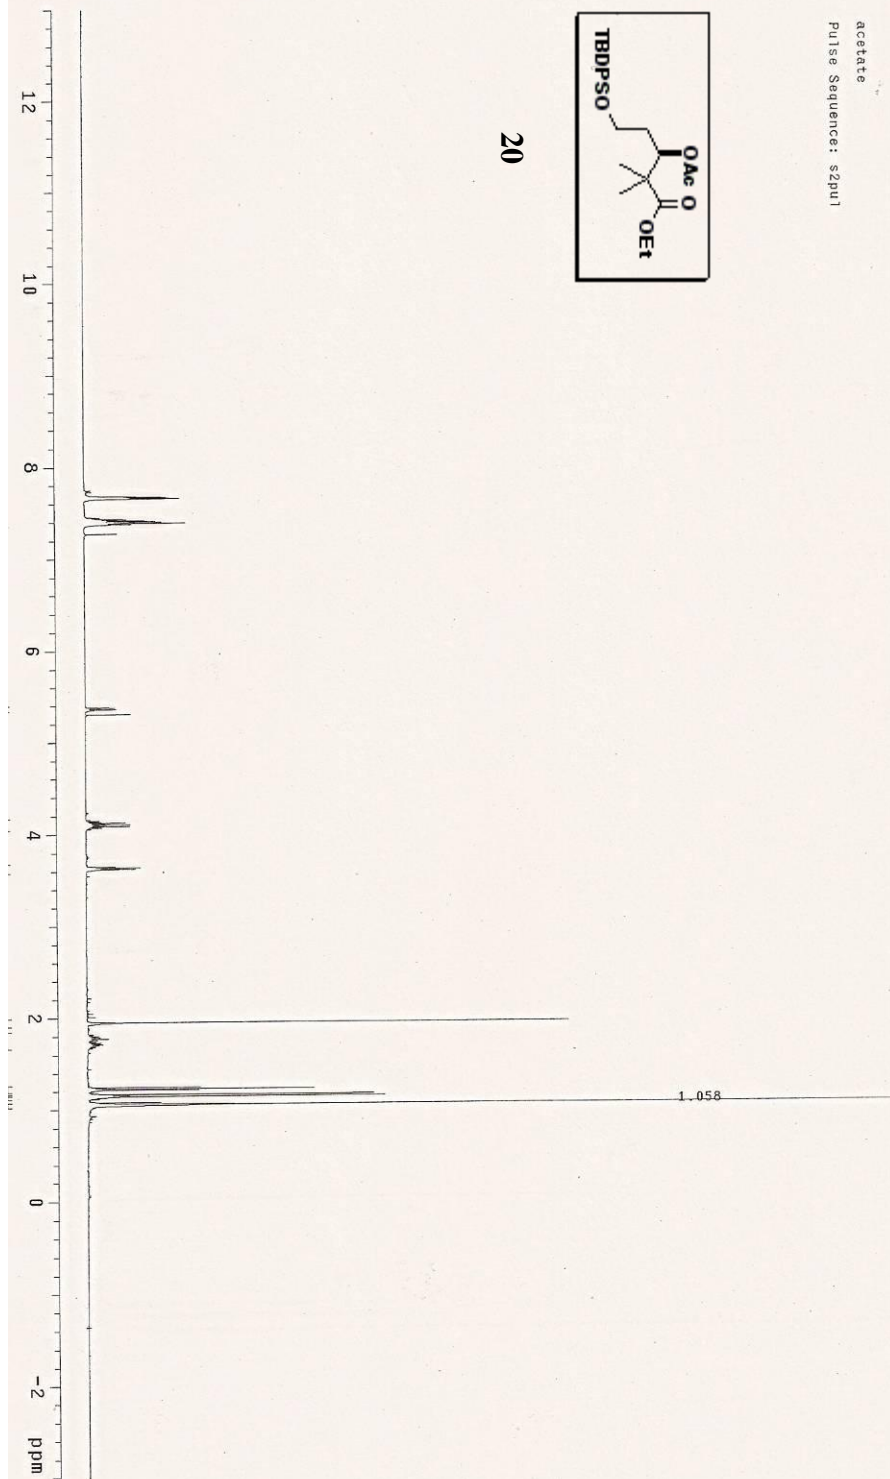

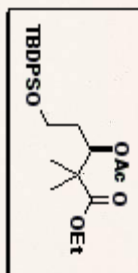

20

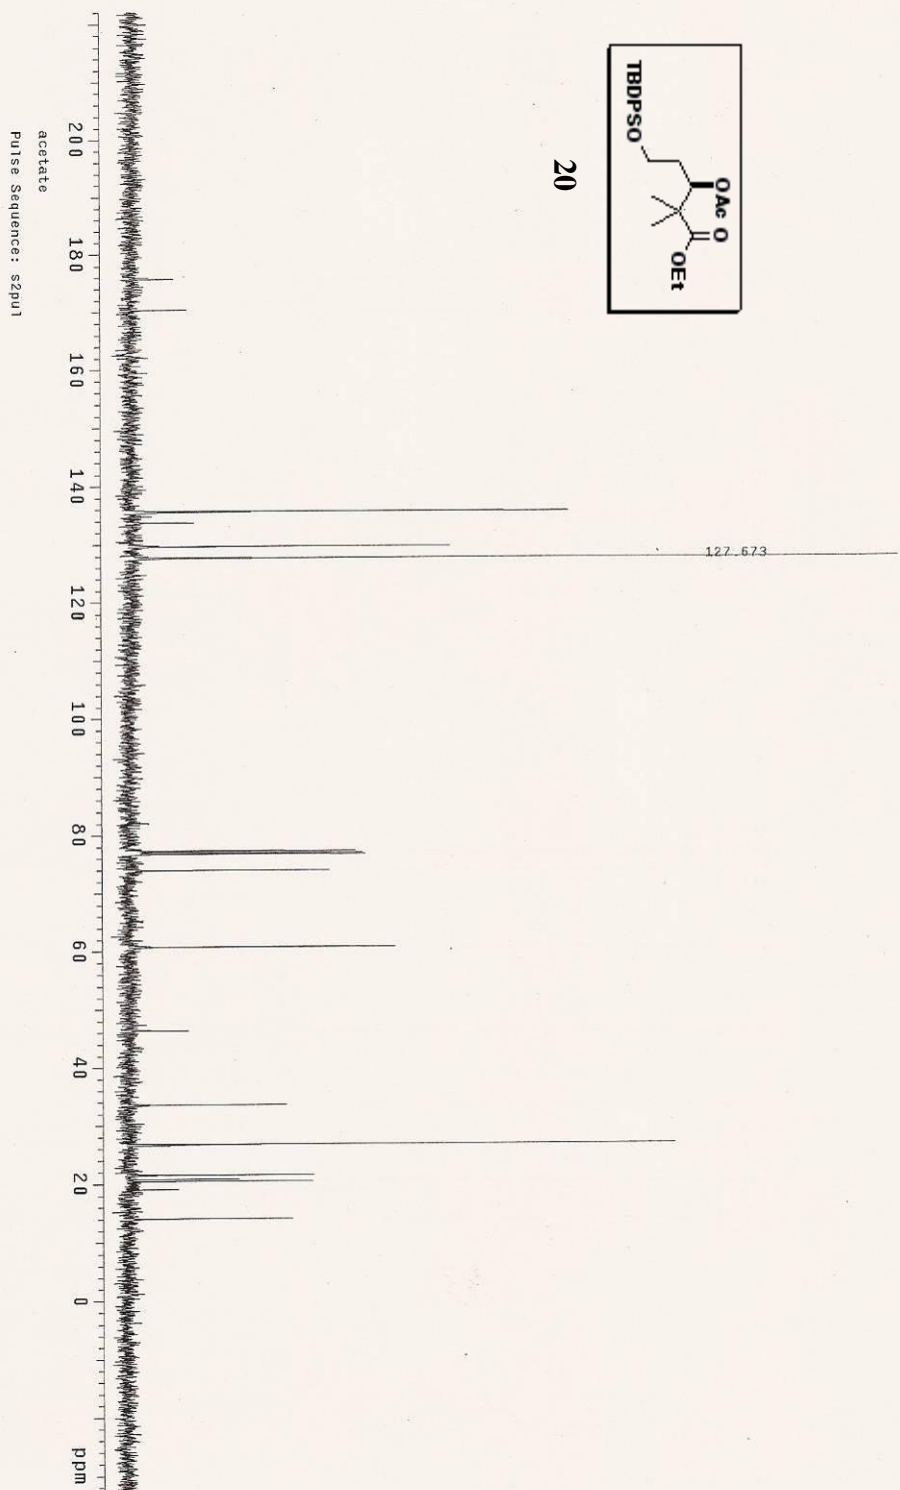



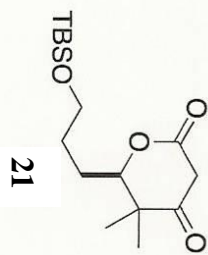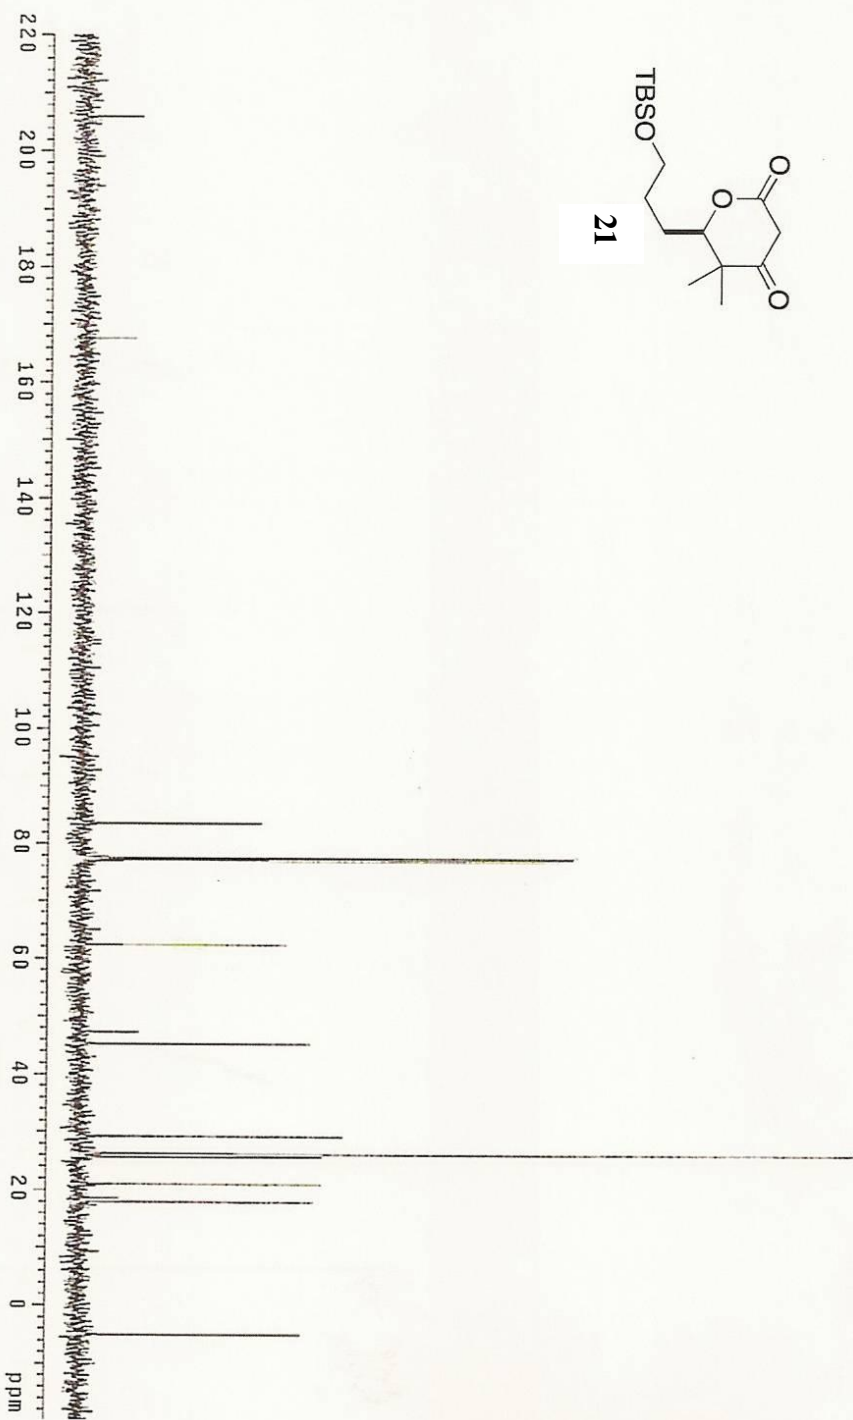

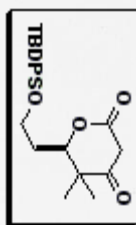

22

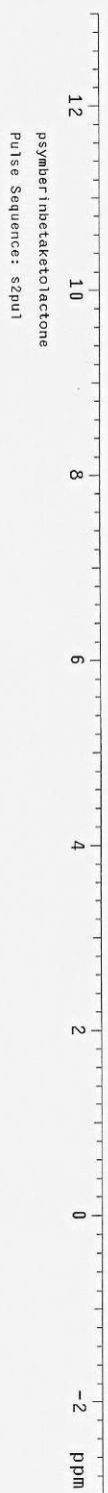

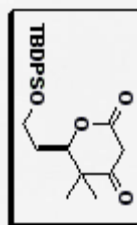

22

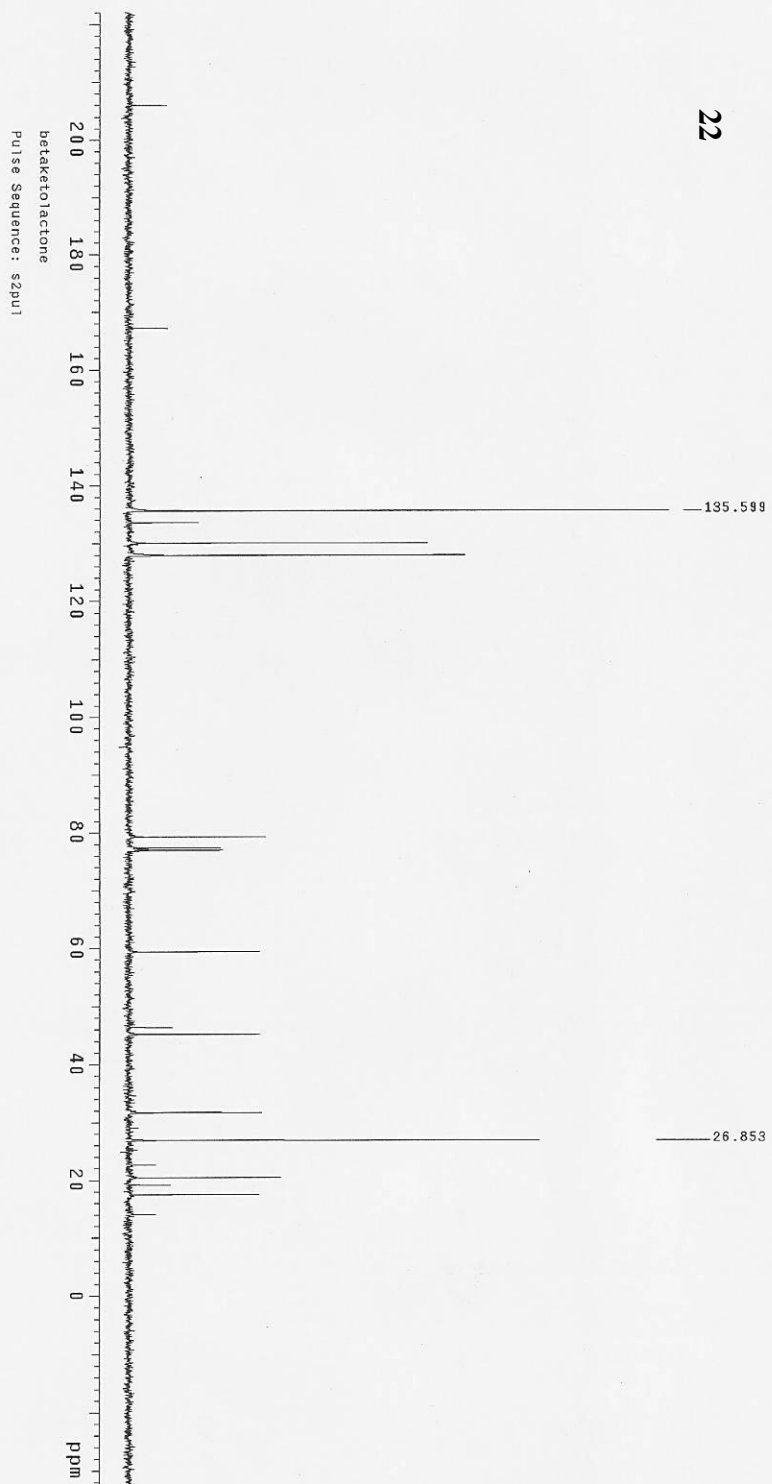

YL-86-288 f-16-24 Methylated enol 1-10-06  
 Pulse Sequence: szpu1  
 Solvent: CDCl3 / 299.1 K  
 Temp: 25.0 C / "lightare"  
 Unit: plus-500 "lightare"  
 Relax: delay 1.000 sec  
 Pulse: 4.000 degrees  
 Pulse: 1.000 sec  
 Width: 8000.0 Hz  
 48 repetitions  
 OBSERVE: H1, 499.3479283 MHz  
 DATA PROCESSING  
 FT size 32768  
 Total time 9 min, 40 sec

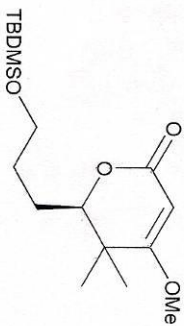

23

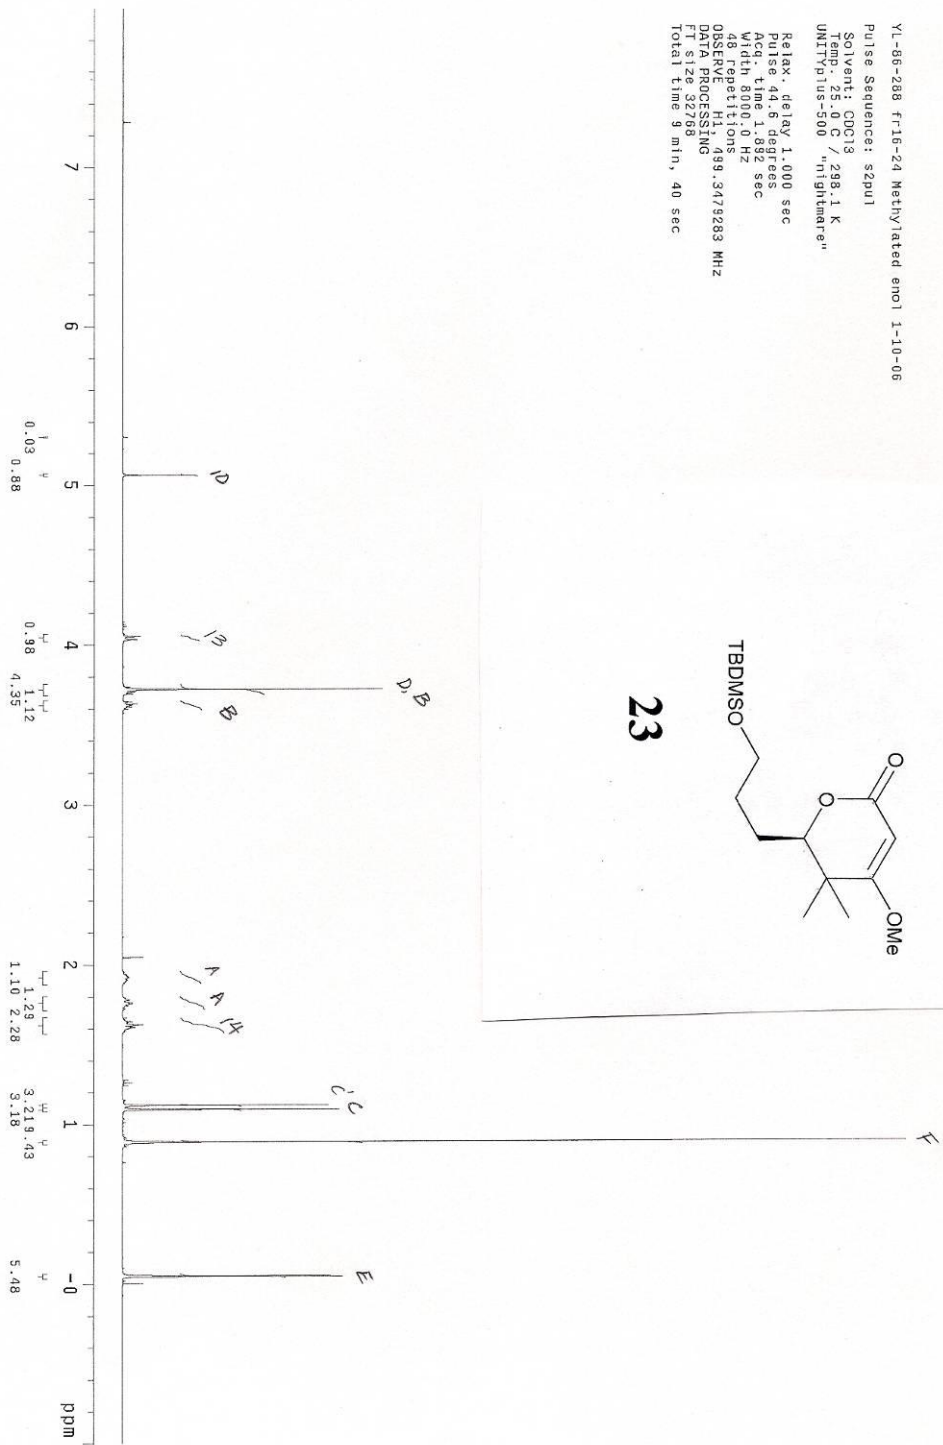



YL-86-288 fr-16-24 Methylated enol 1-10-06  
 Pulse Sequence: s2pul  
 Solvent: cdcl3  
 Temp: 25.0 C / 298.1 K  
 User: 1-14-87 "nightmare"  
 UNITYplus-500 "nightmare"  
 Relax. delay 1.000 sec  
 Pulse 99.2 degrees  
 Acq. time 0.250 sec  
 F1 300.136 MHz  
 564 repetitions  
 OBSERVE C13, 125.5611194 MHz  
 DECOUPLE H1, 499.3504248 MHz  
 Power 48 db  
 on during delay  
 off during acquisition  
 WALTZ16 modulated  
 DALT 160.000 MHz  
 Line broadening 3.0 Hz  
 FT size 32768  
 Total time 35 hr, 1 min, 30 sec

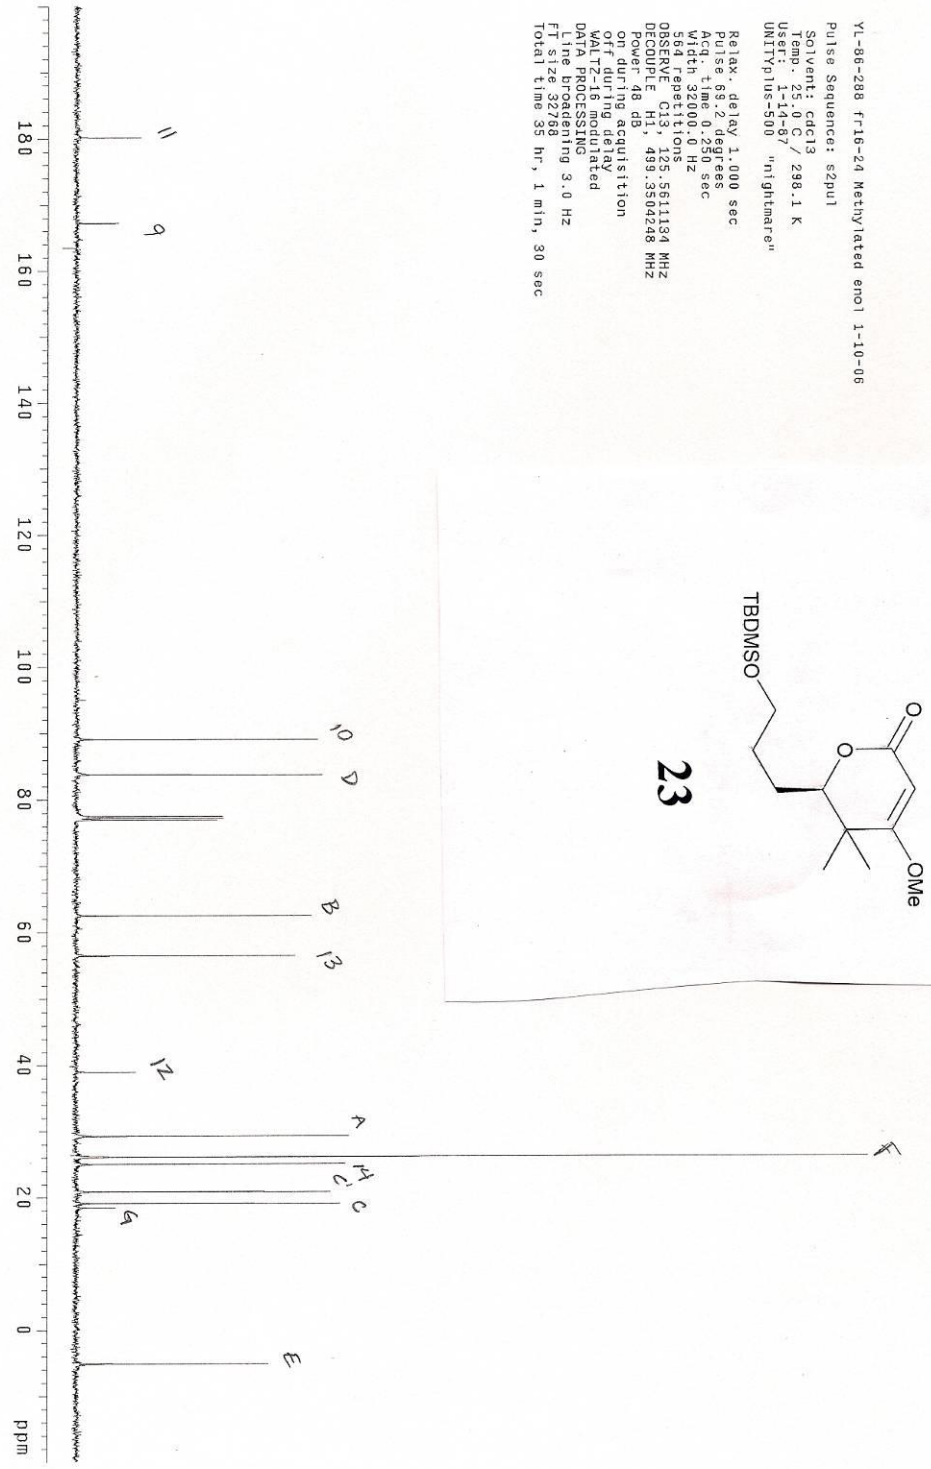





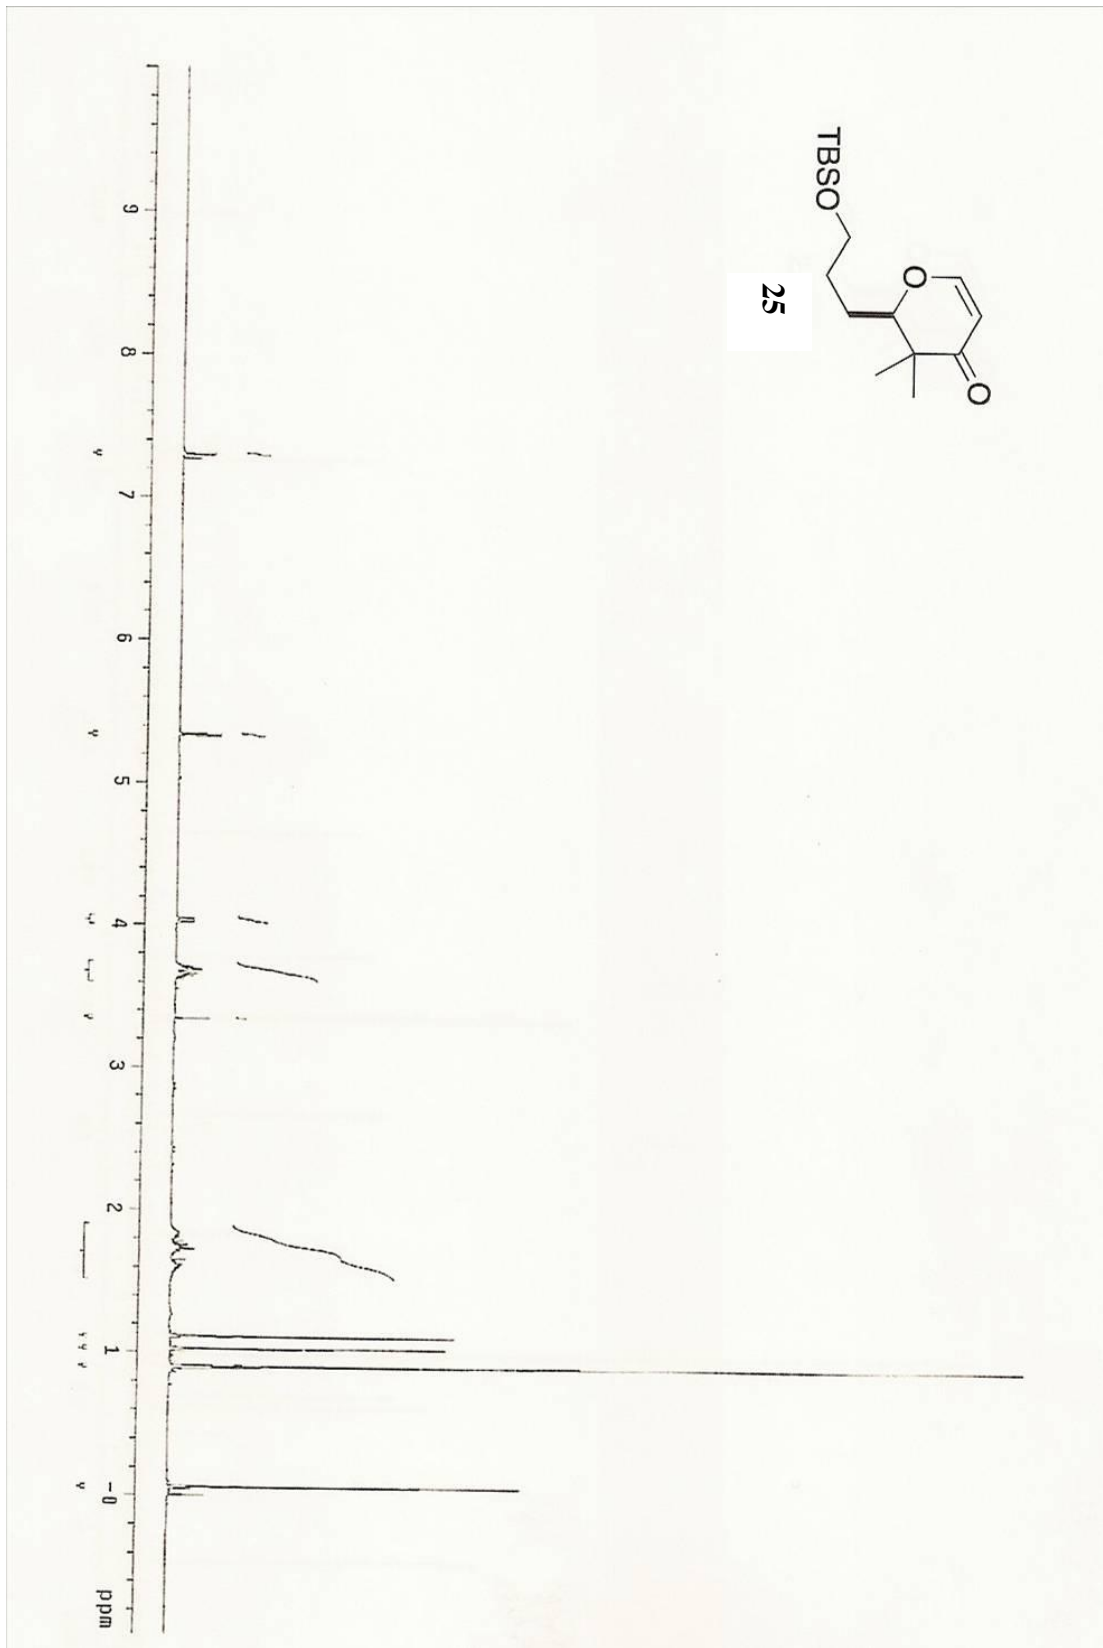

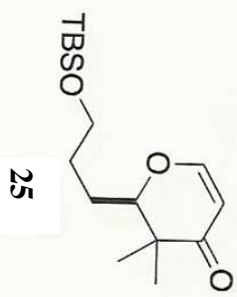

25

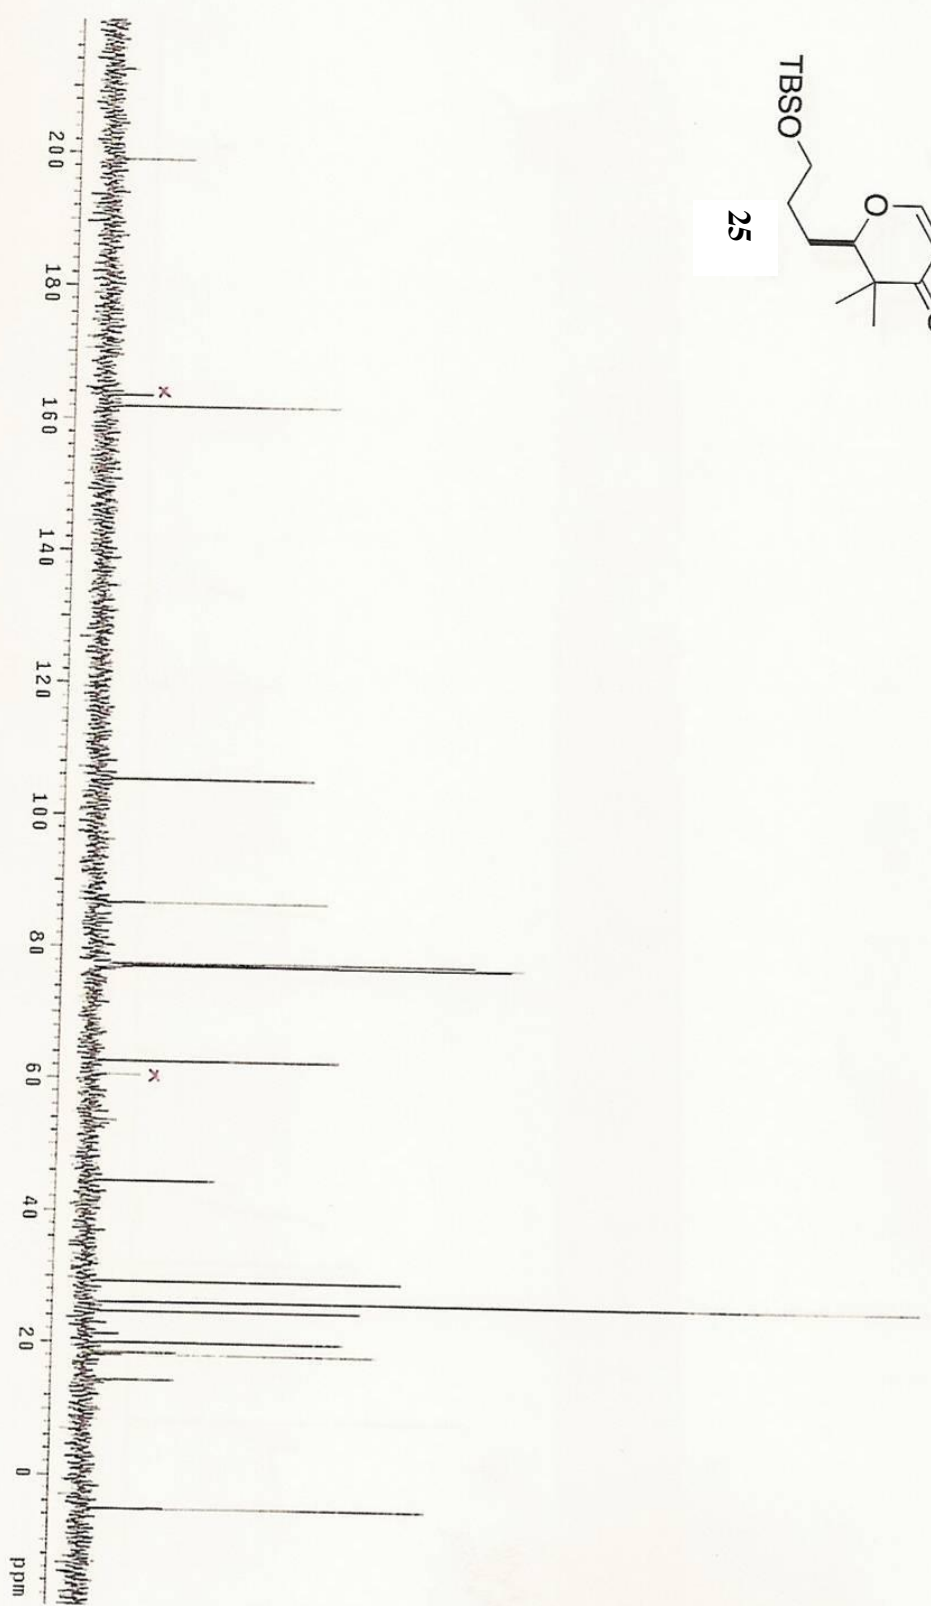

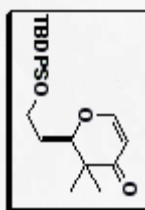

26

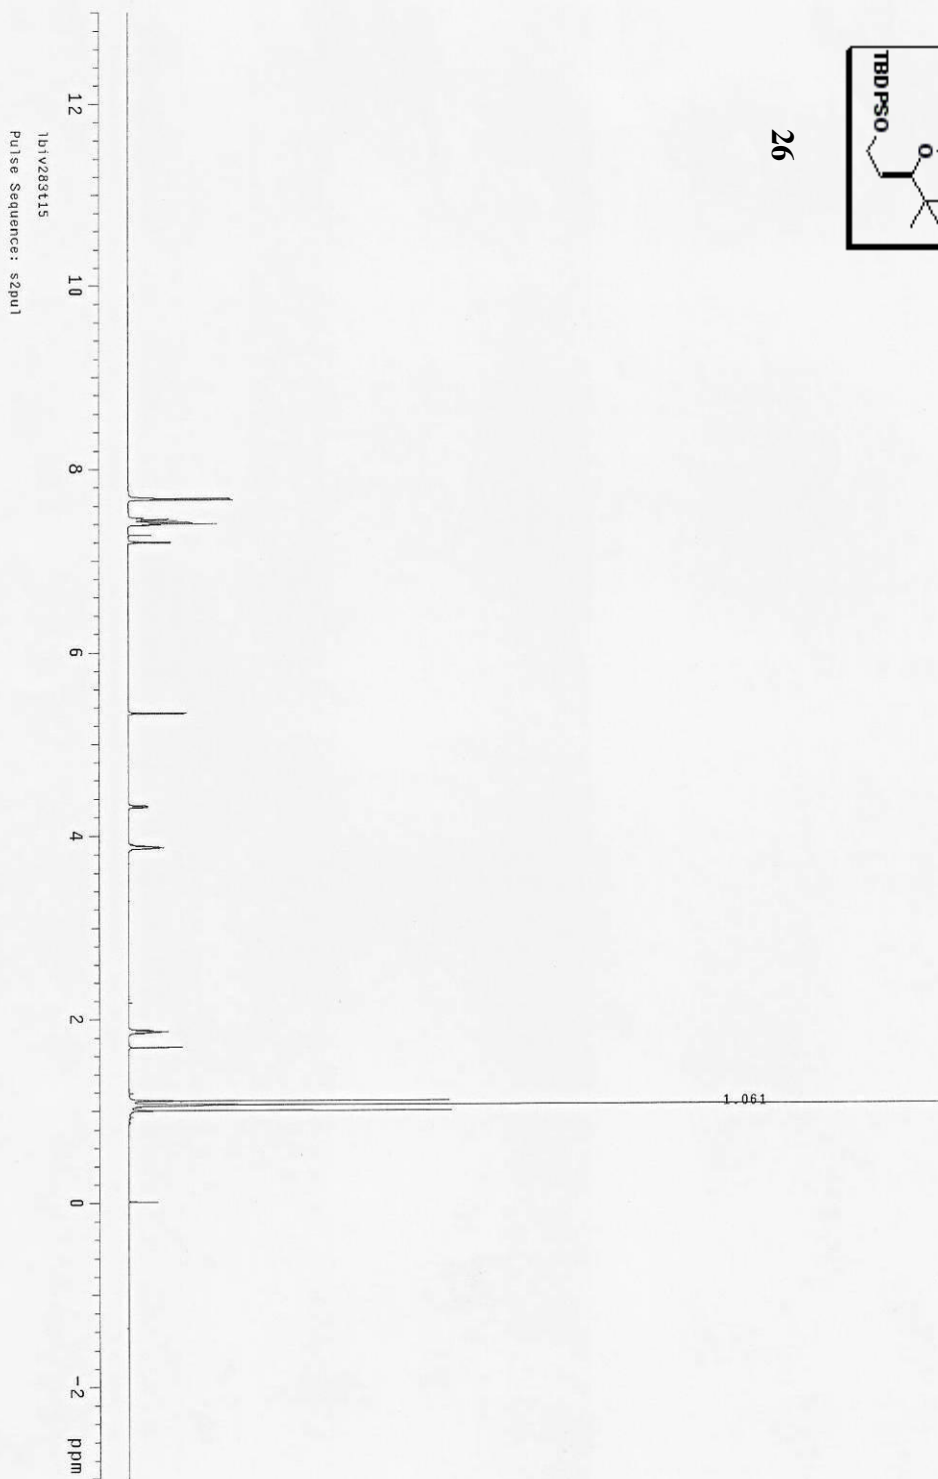

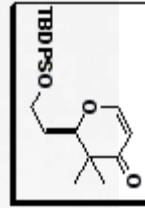

26

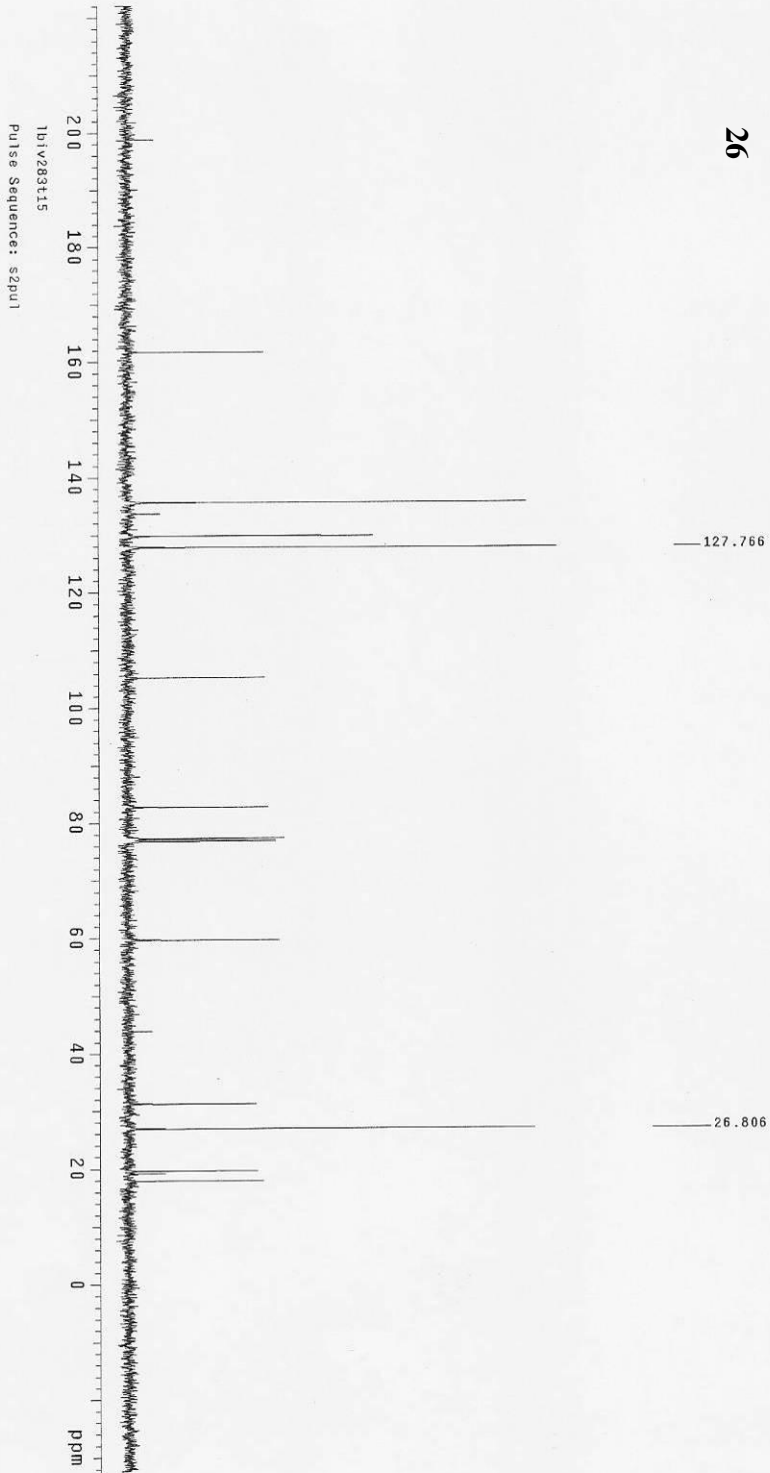

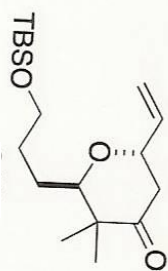

9

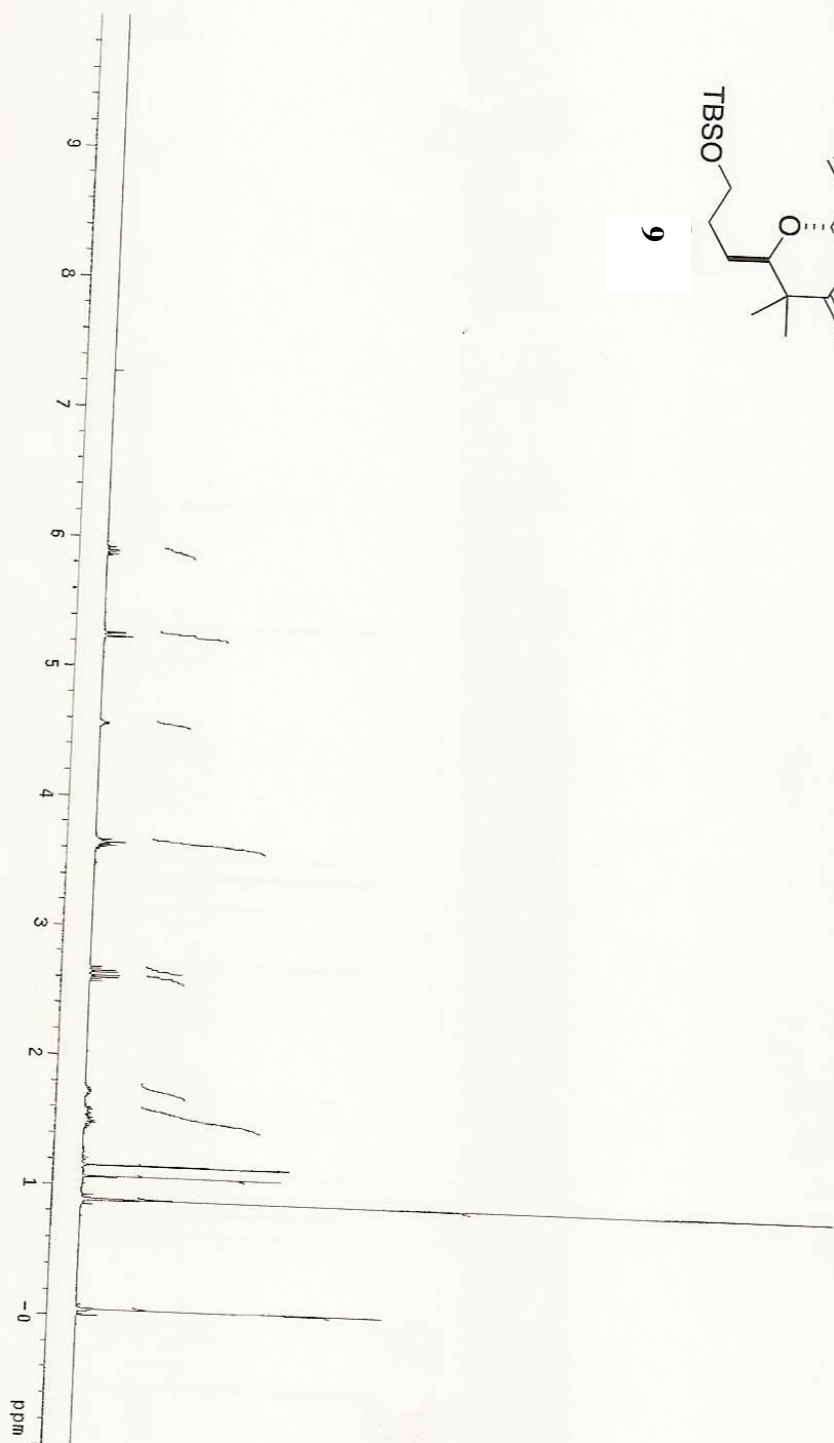



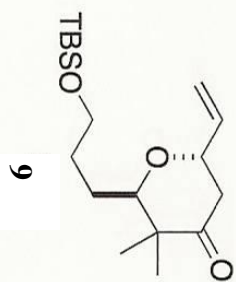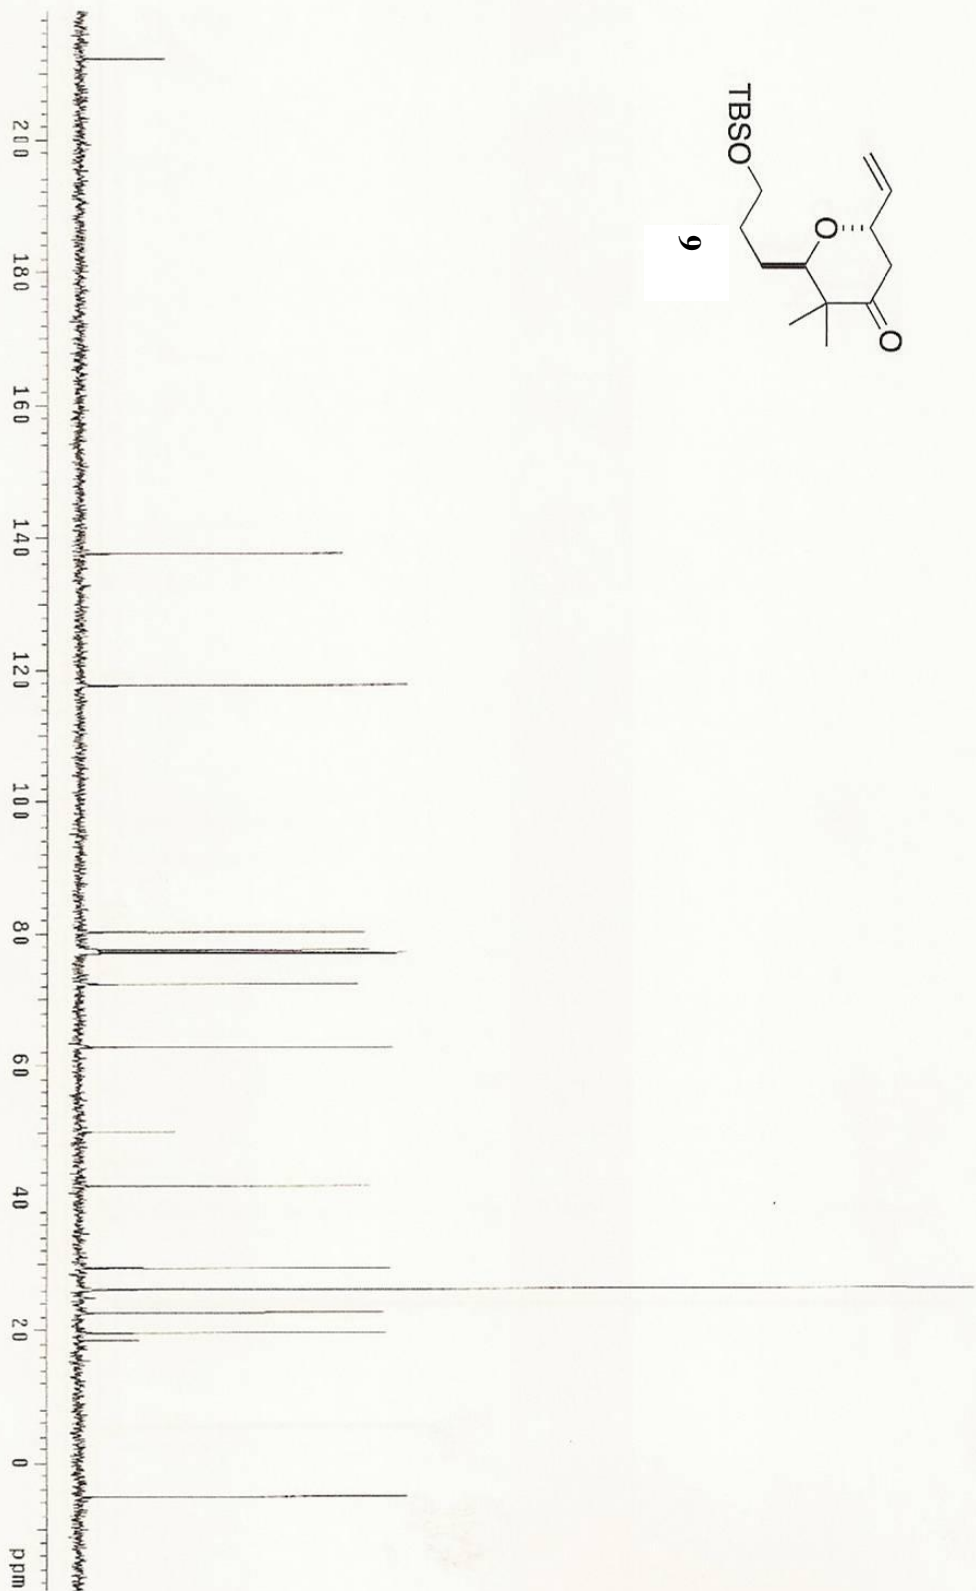

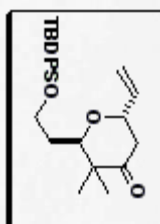

10

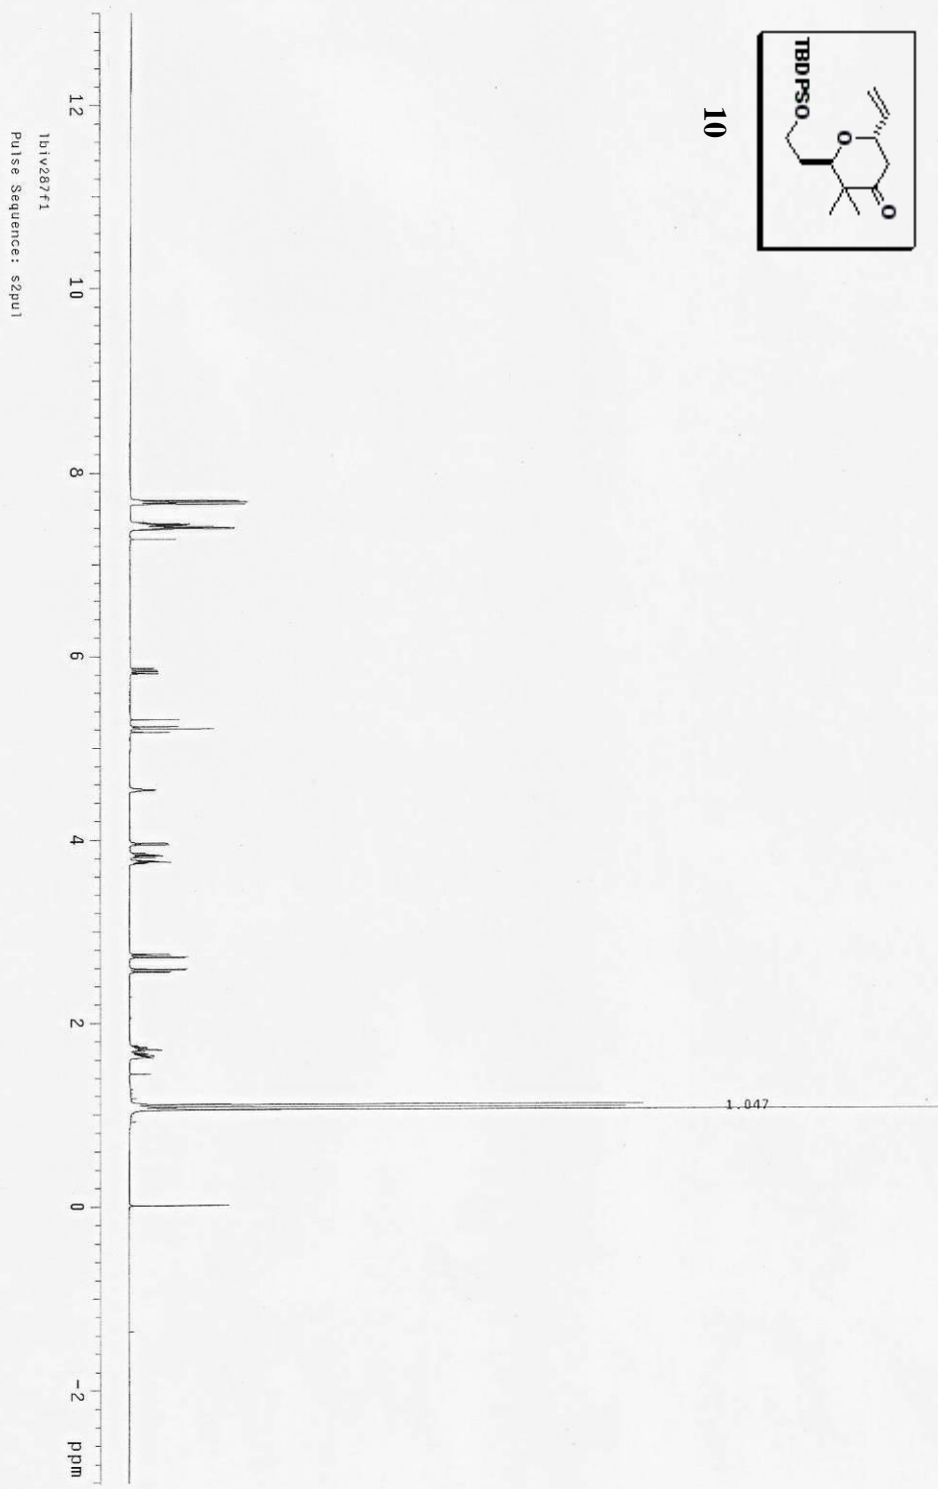

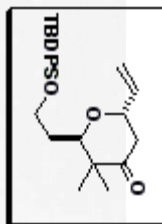

10

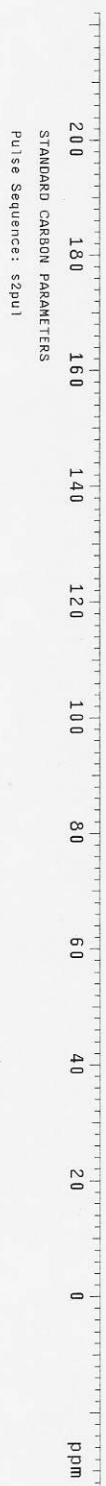

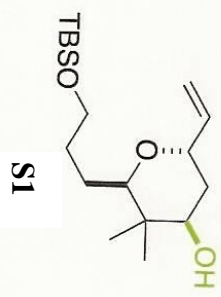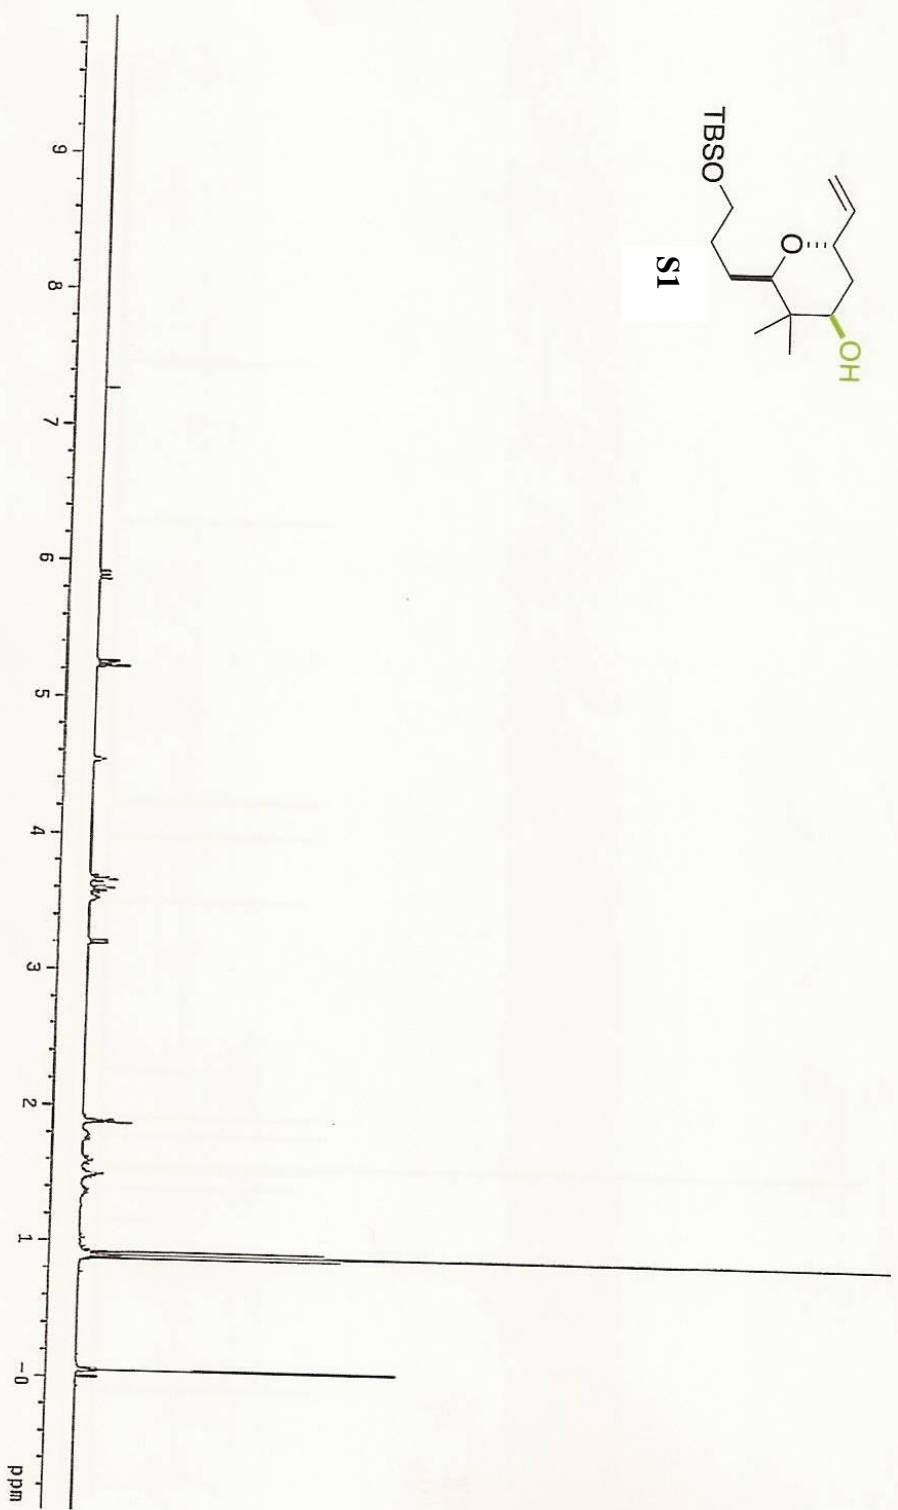

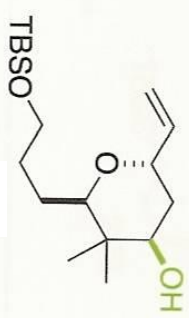

S1

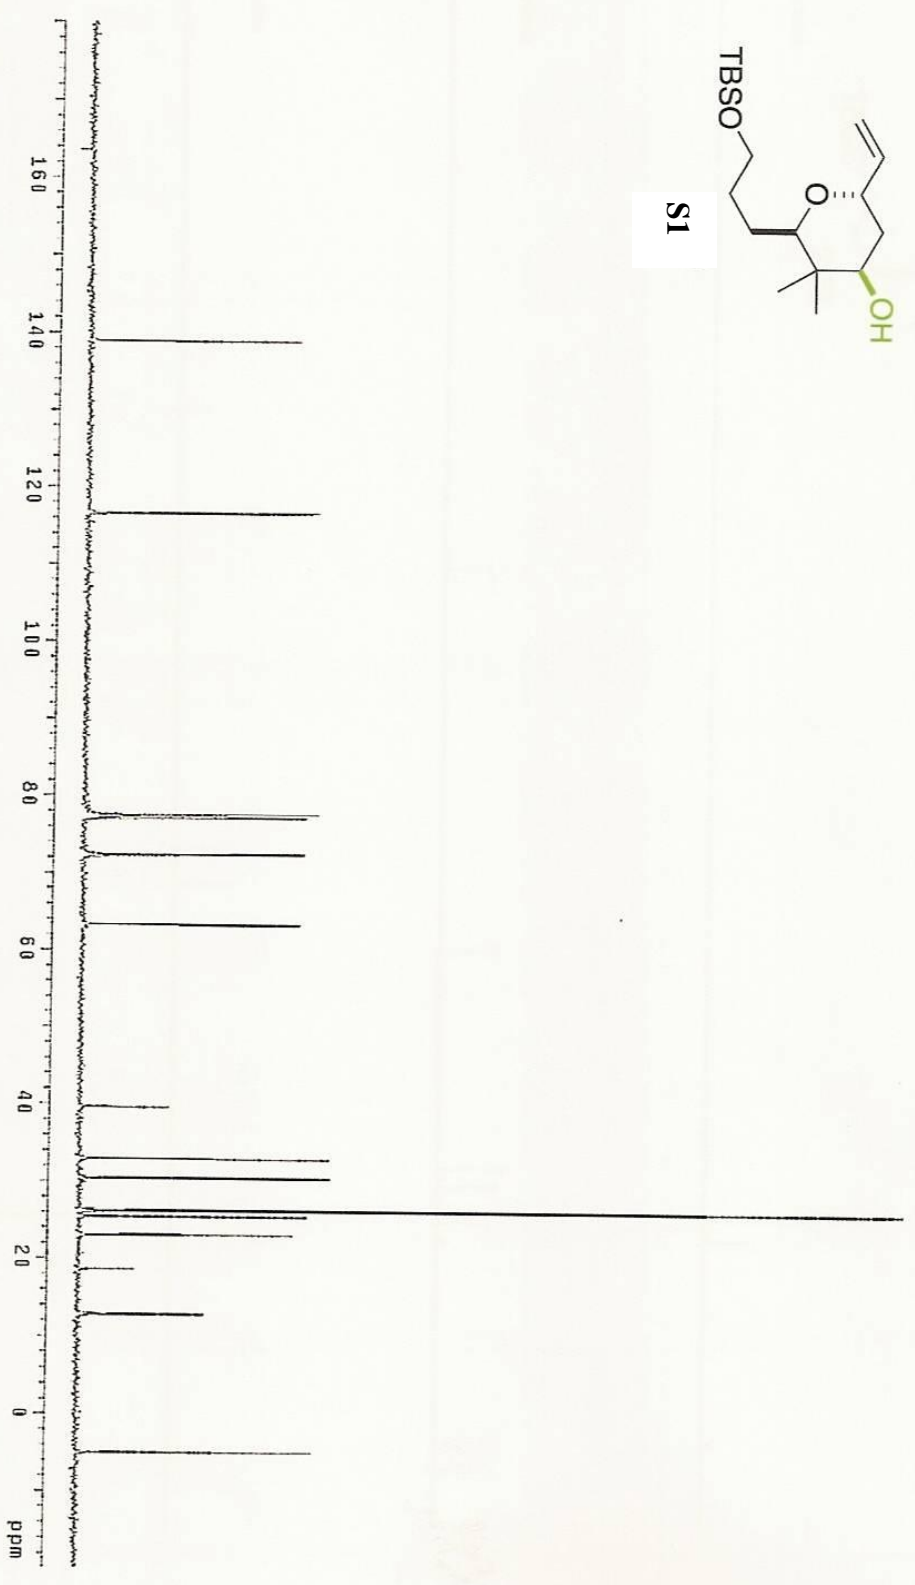

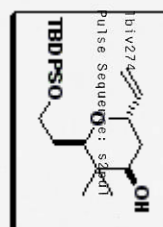

S2

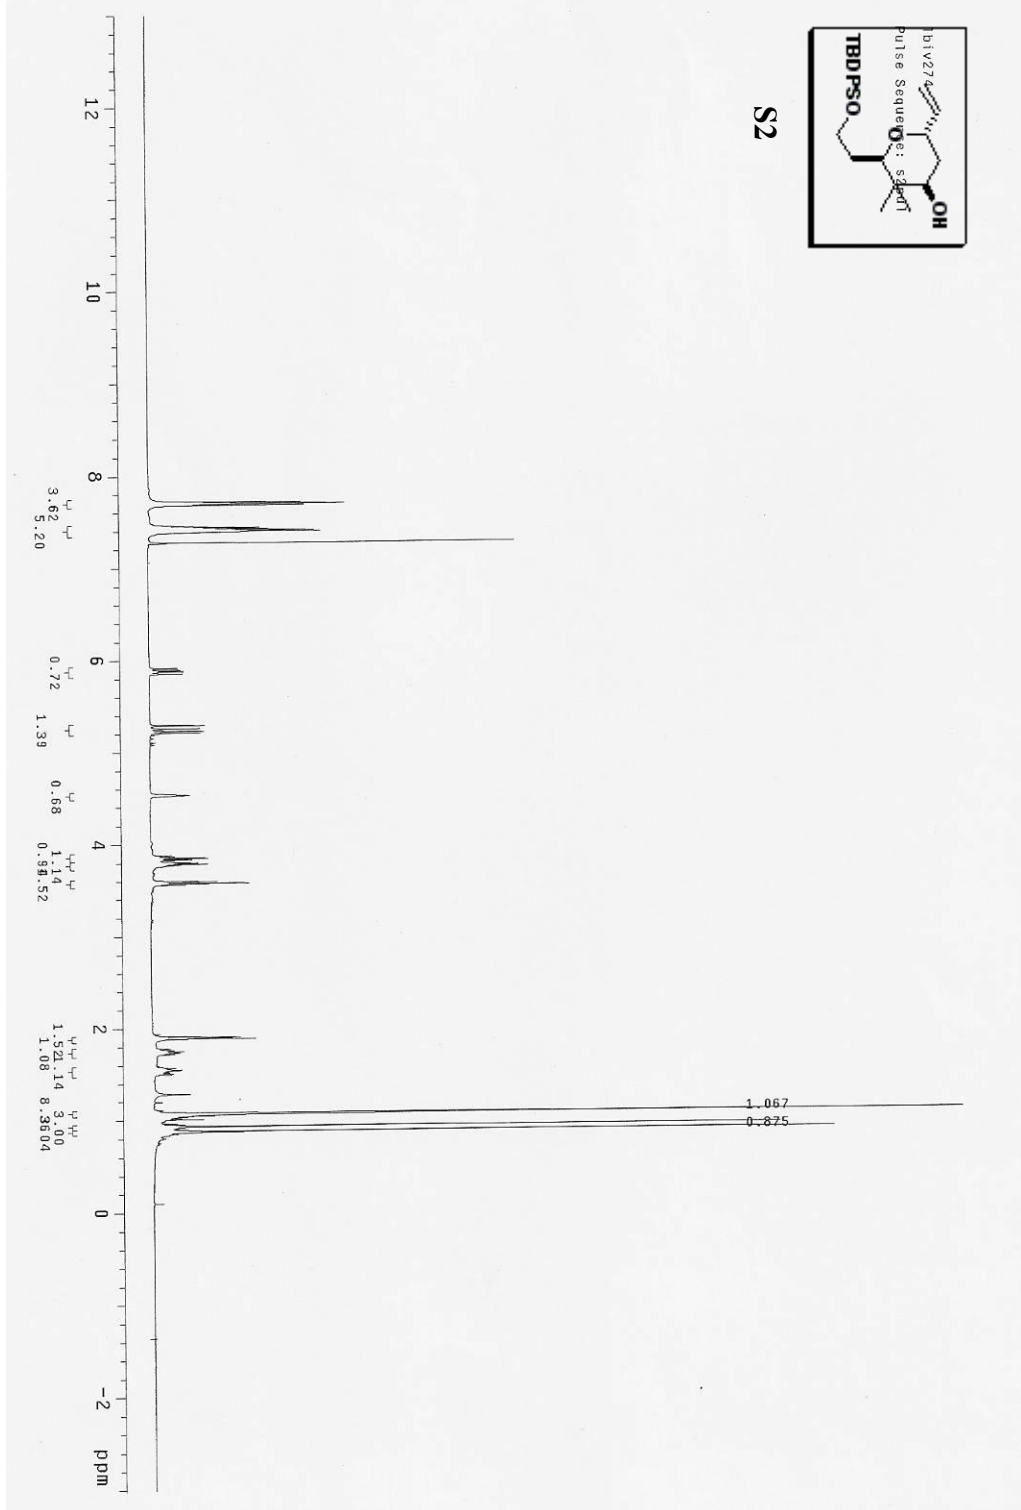

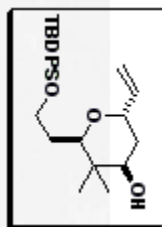

S2

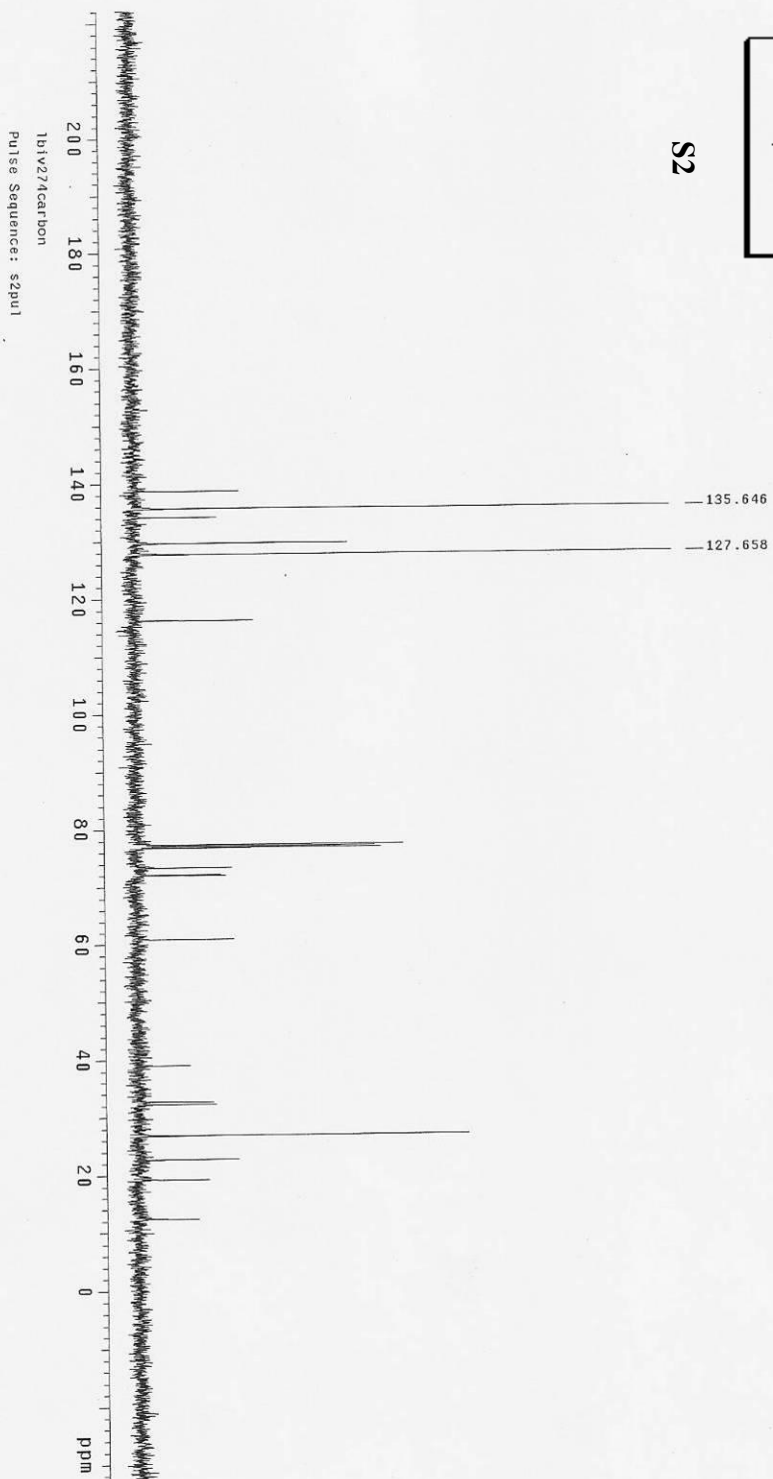

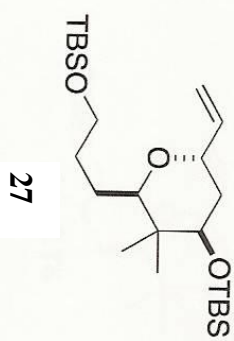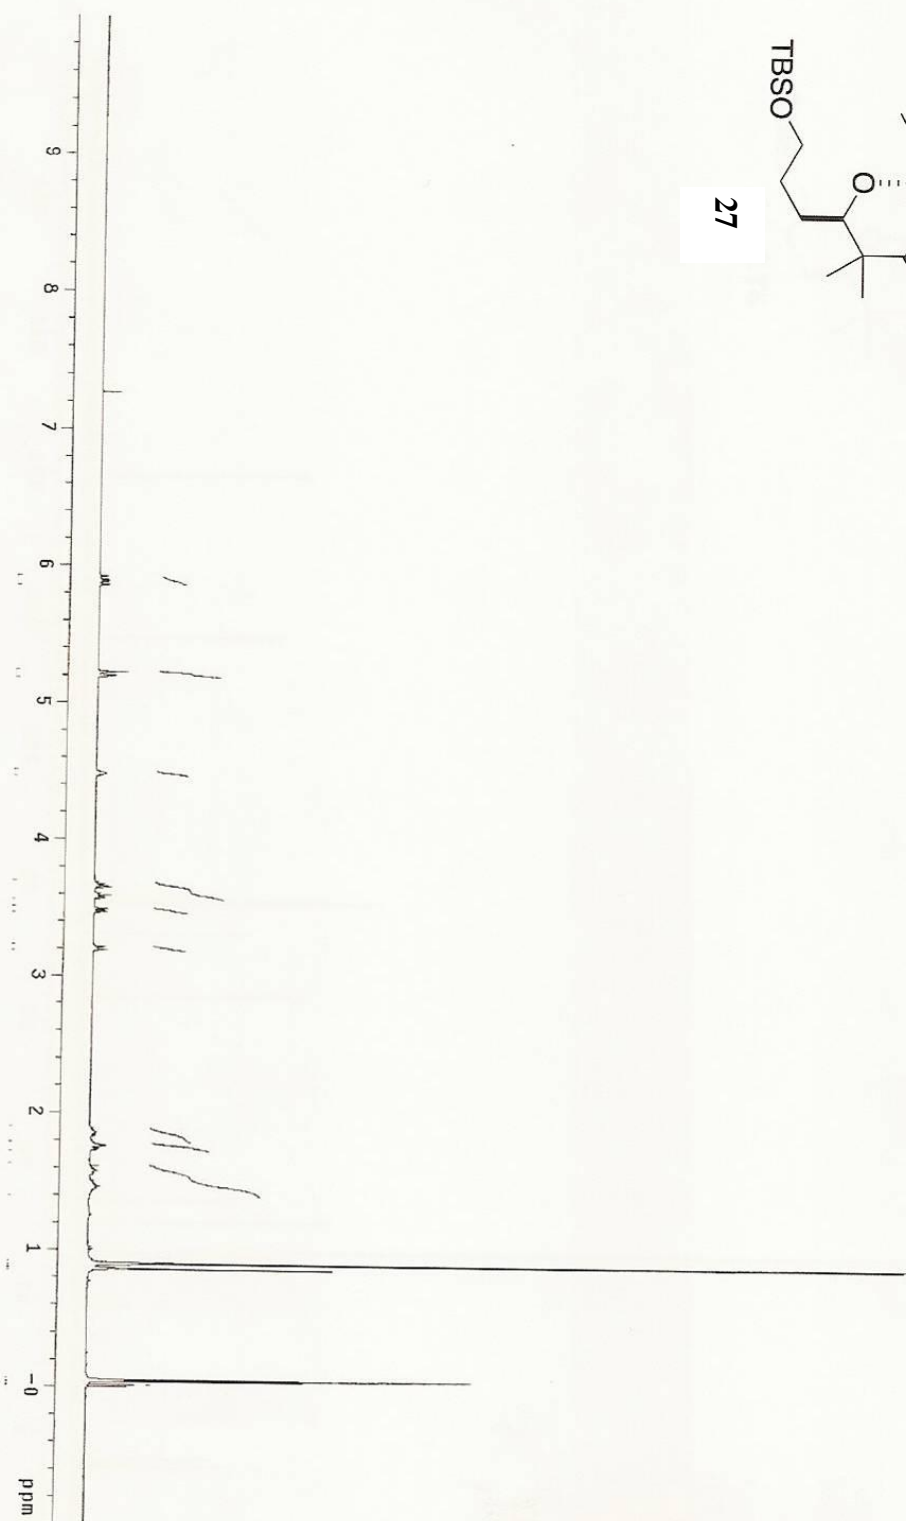



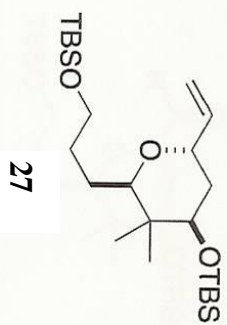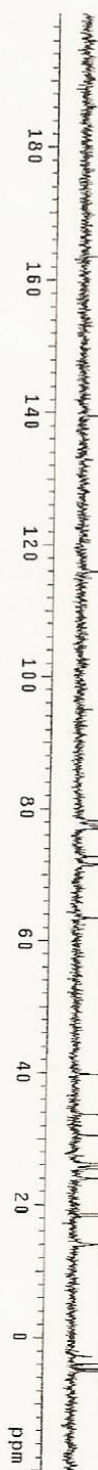

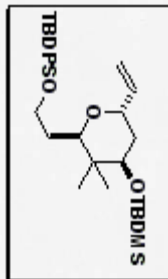

28

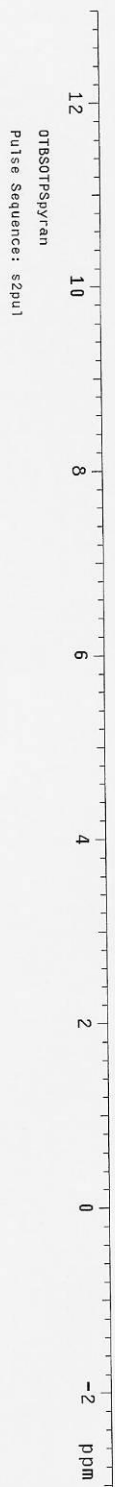

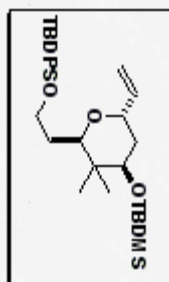

28

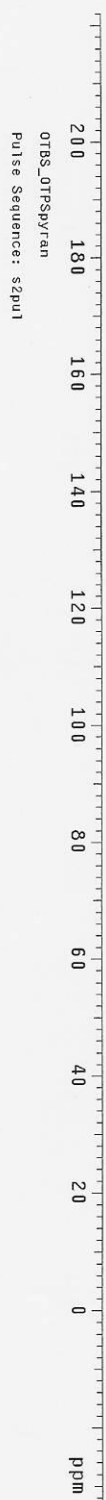

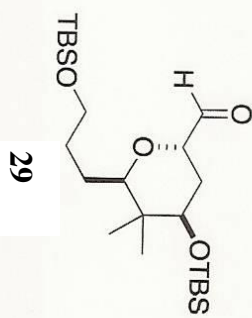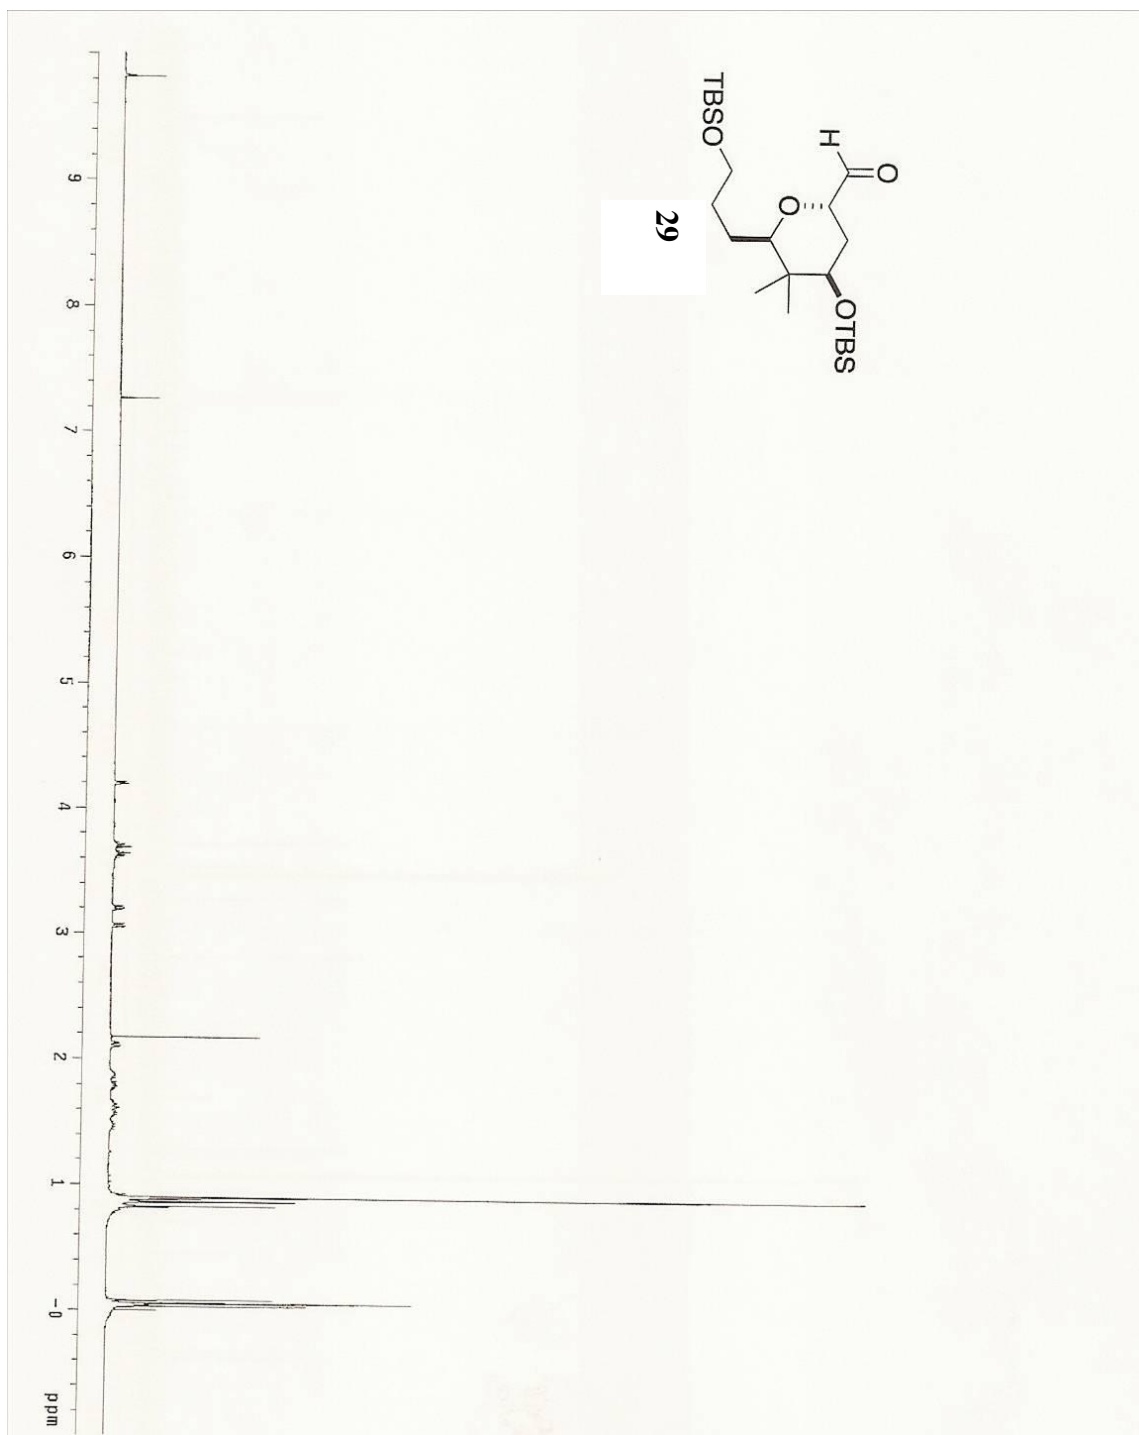

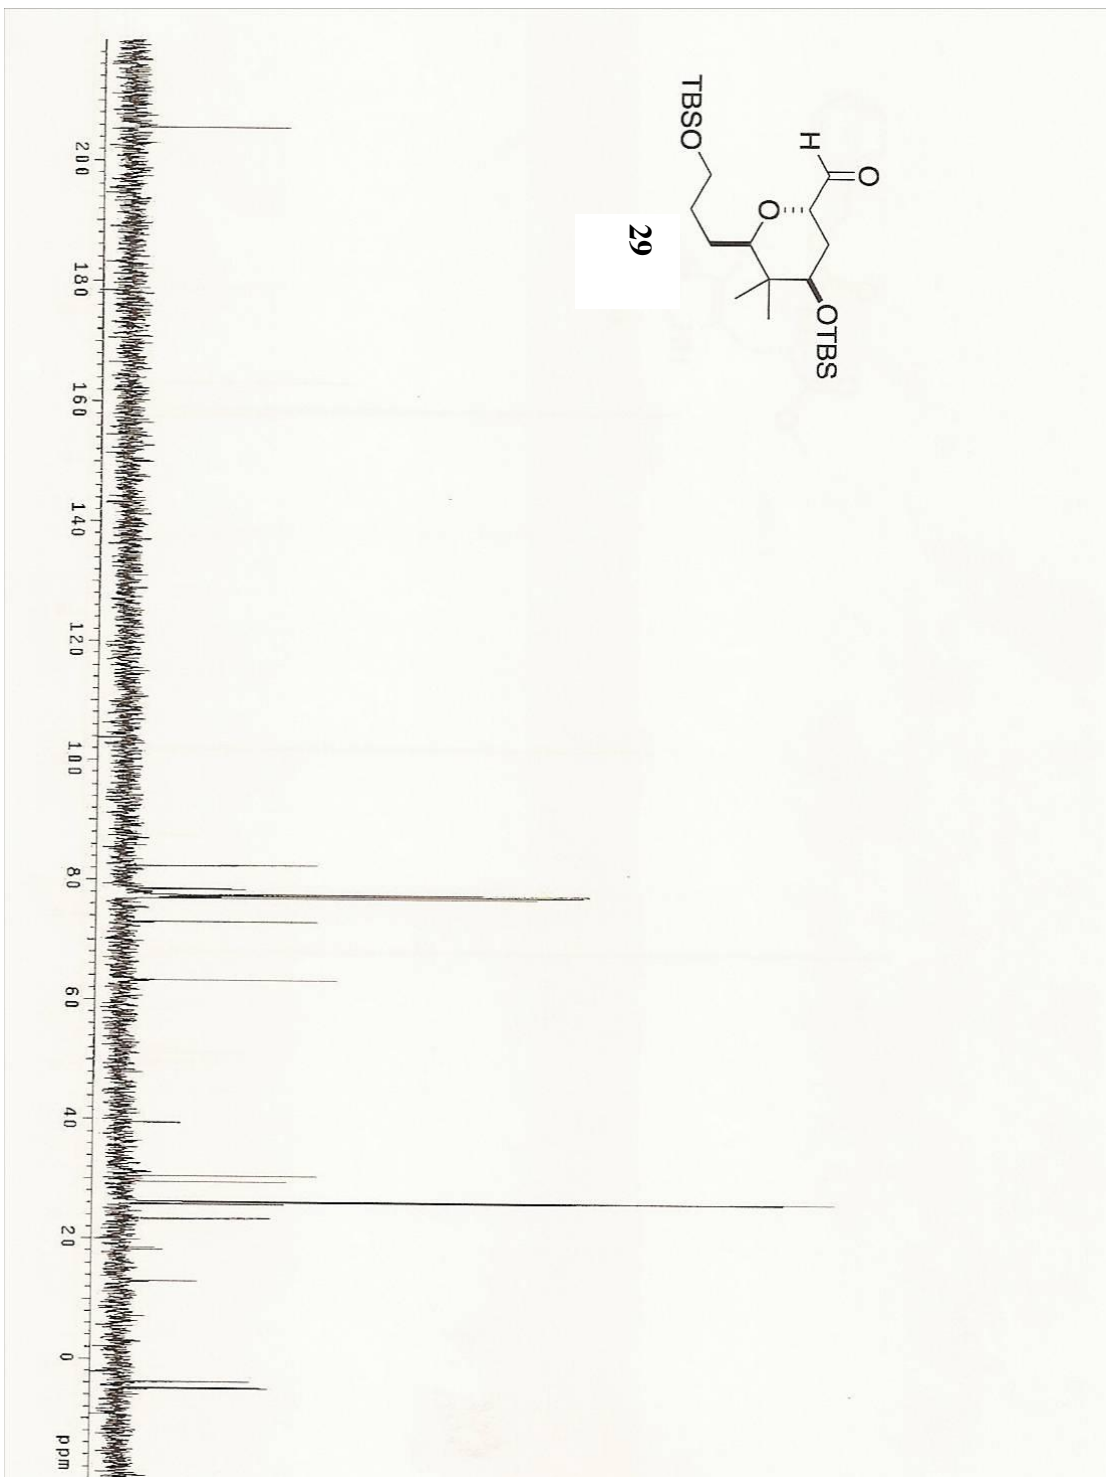

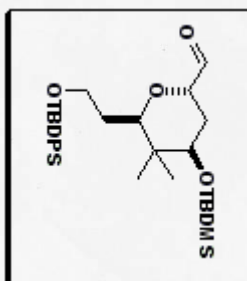

7

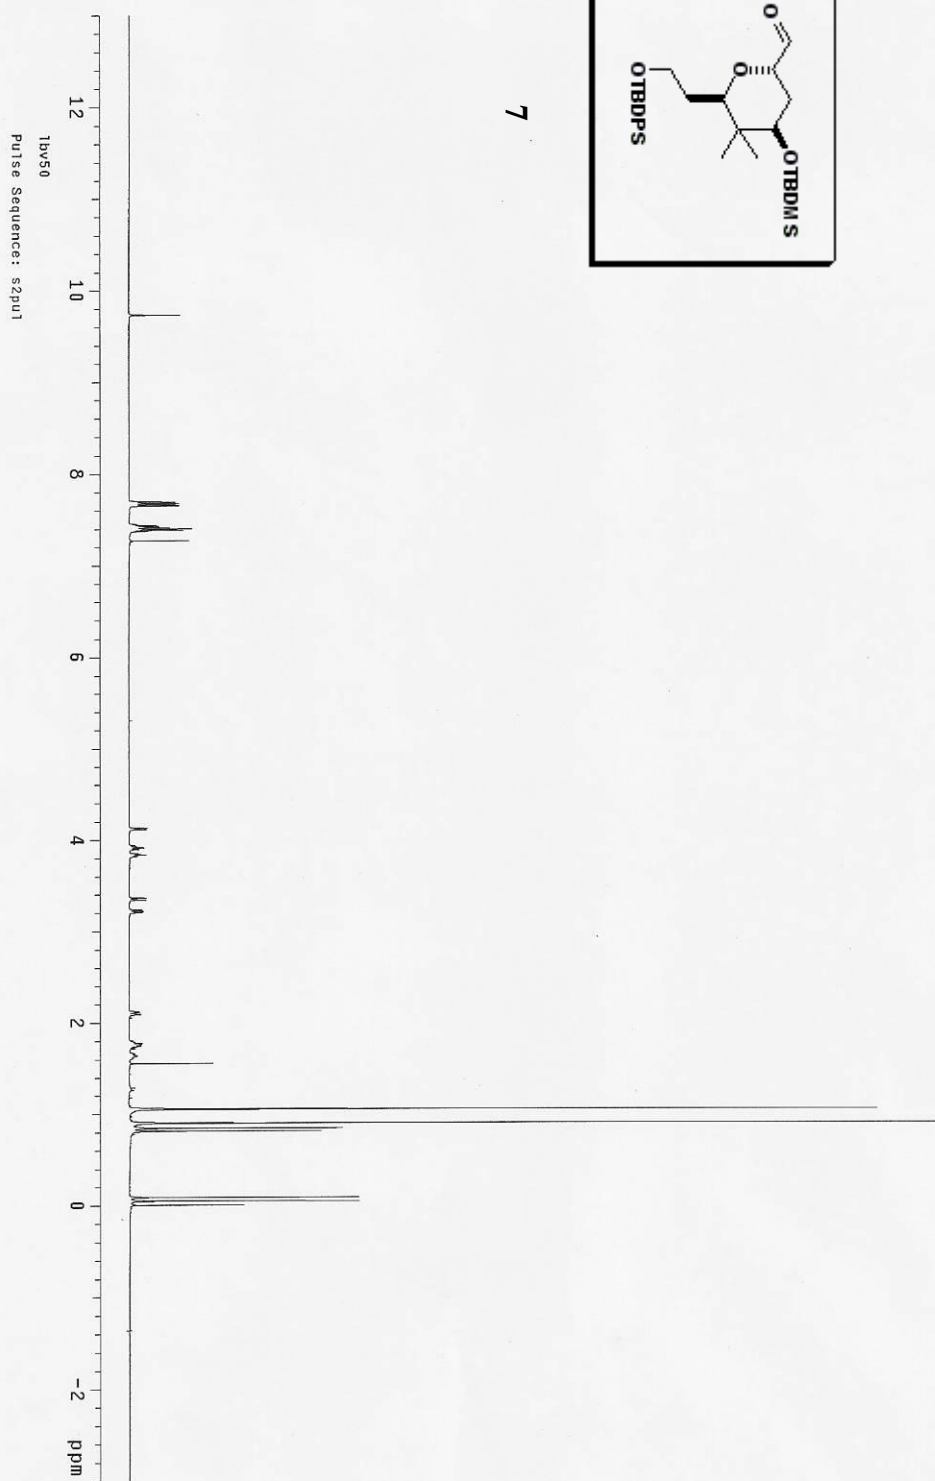

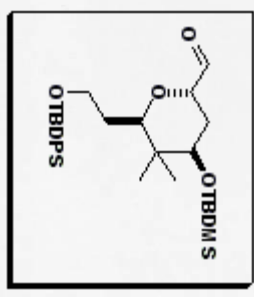

7

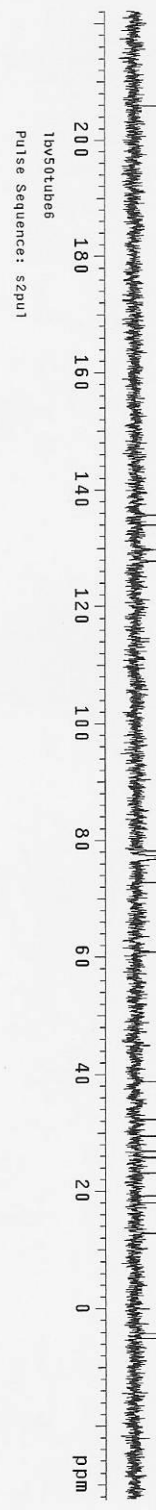

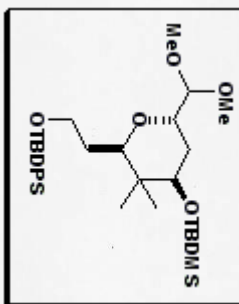

6

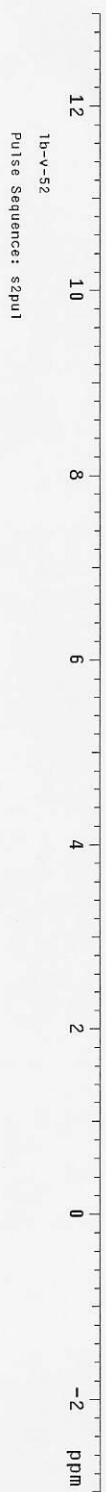



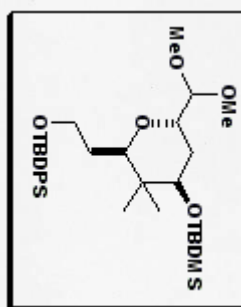

6

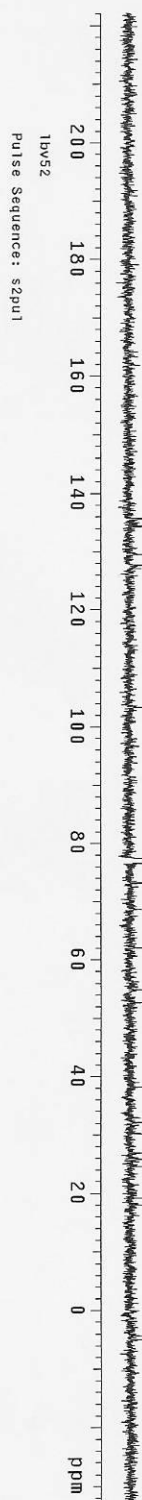



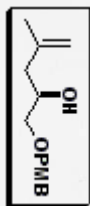

31

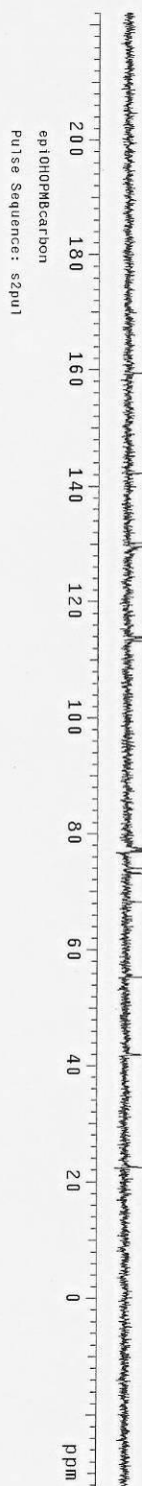

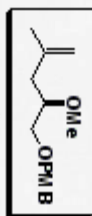

32

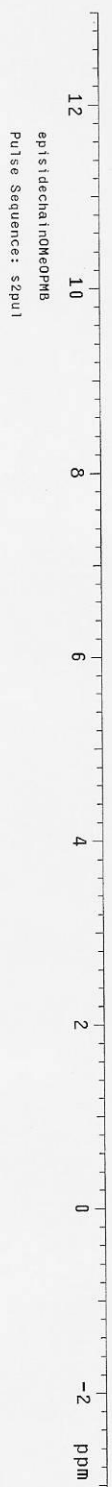

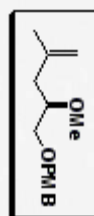

32

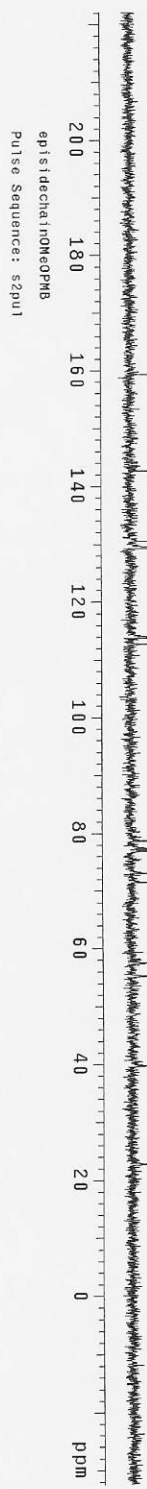

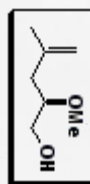

S3

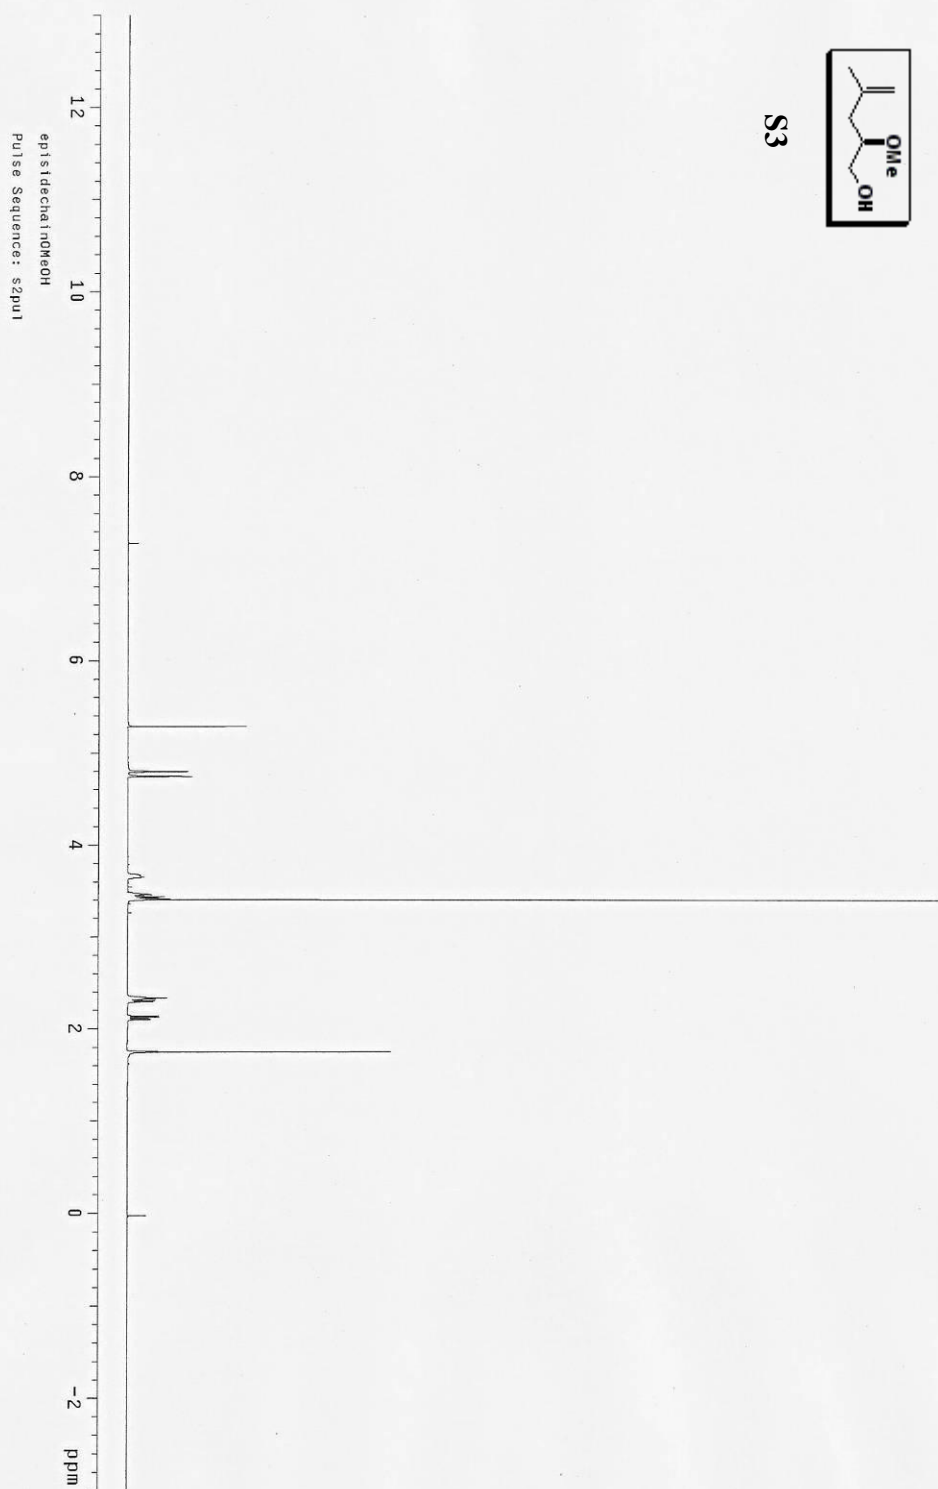

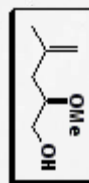

S3

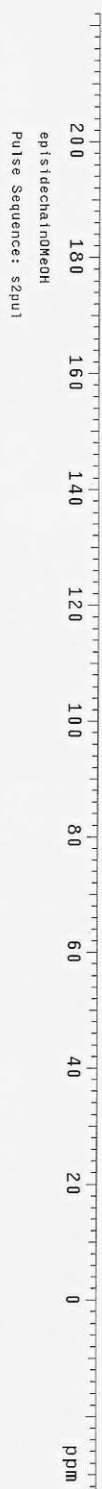

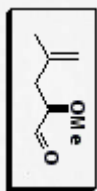

33

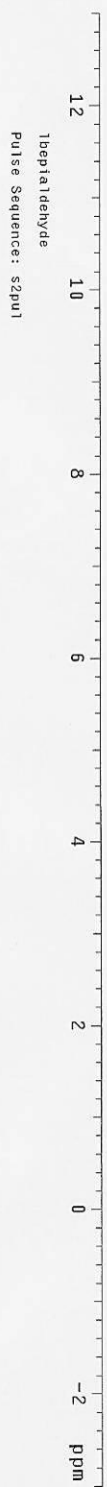



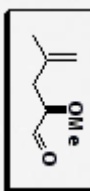

33

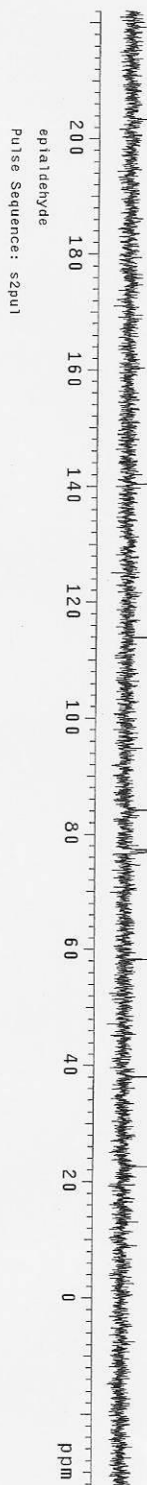



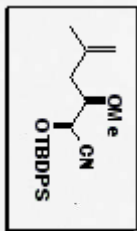

34

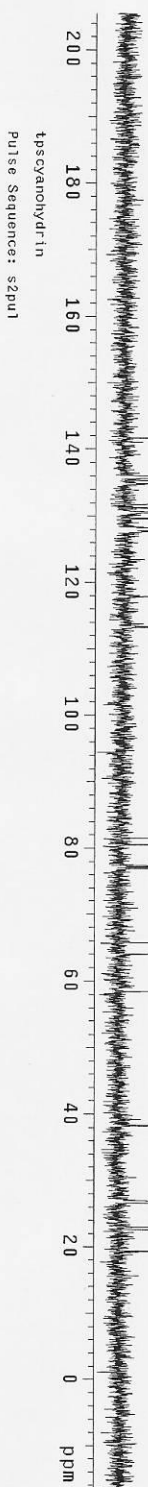

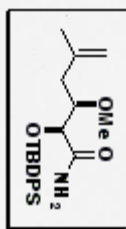

5

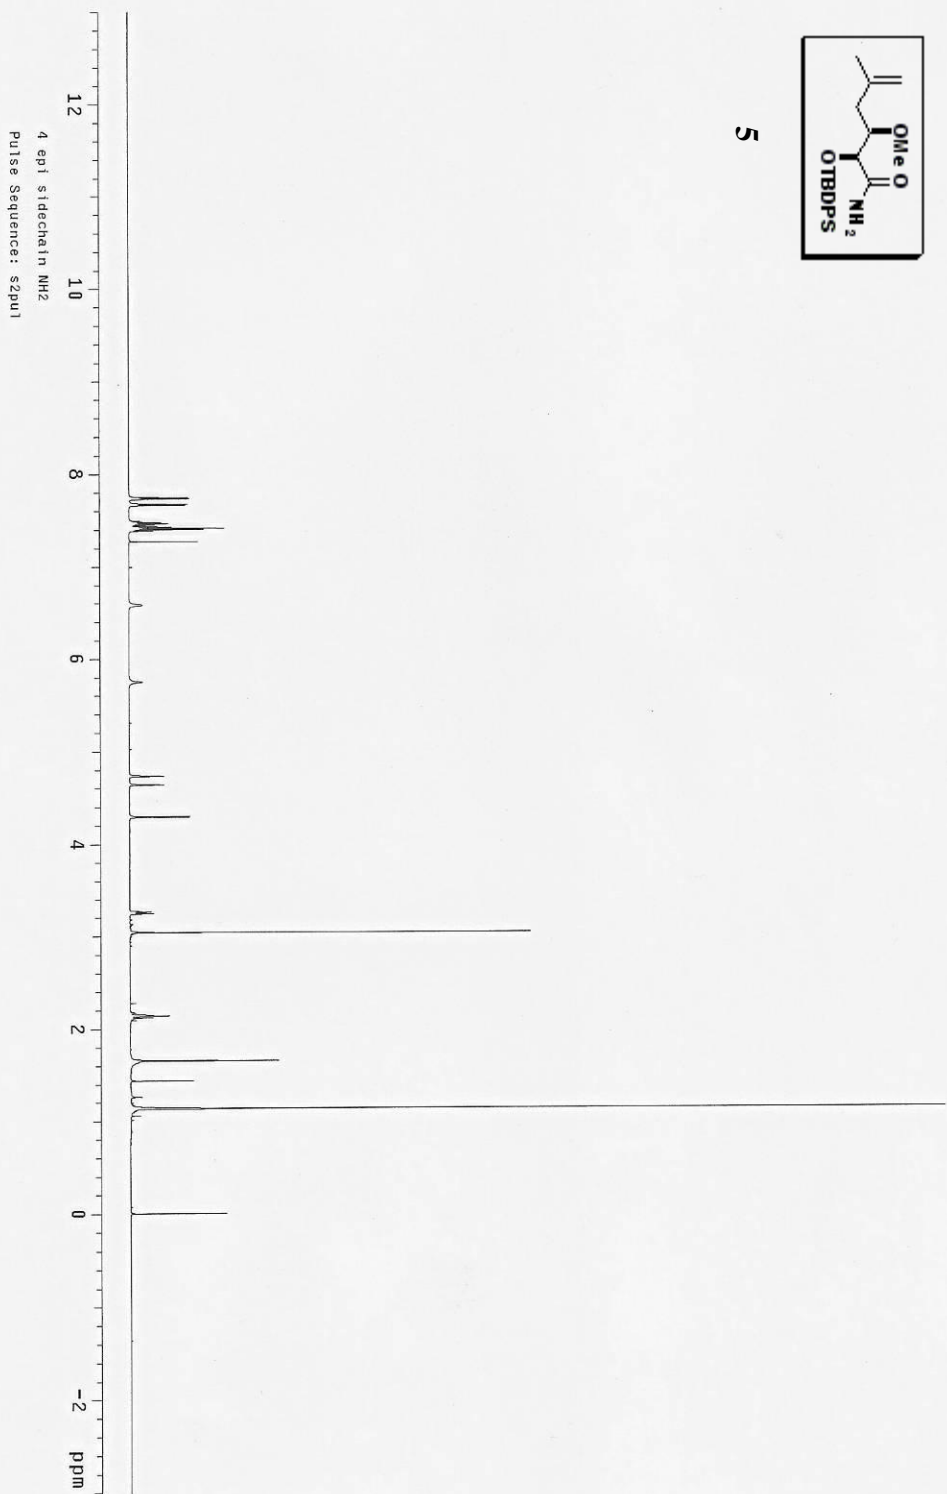

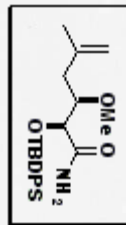

5

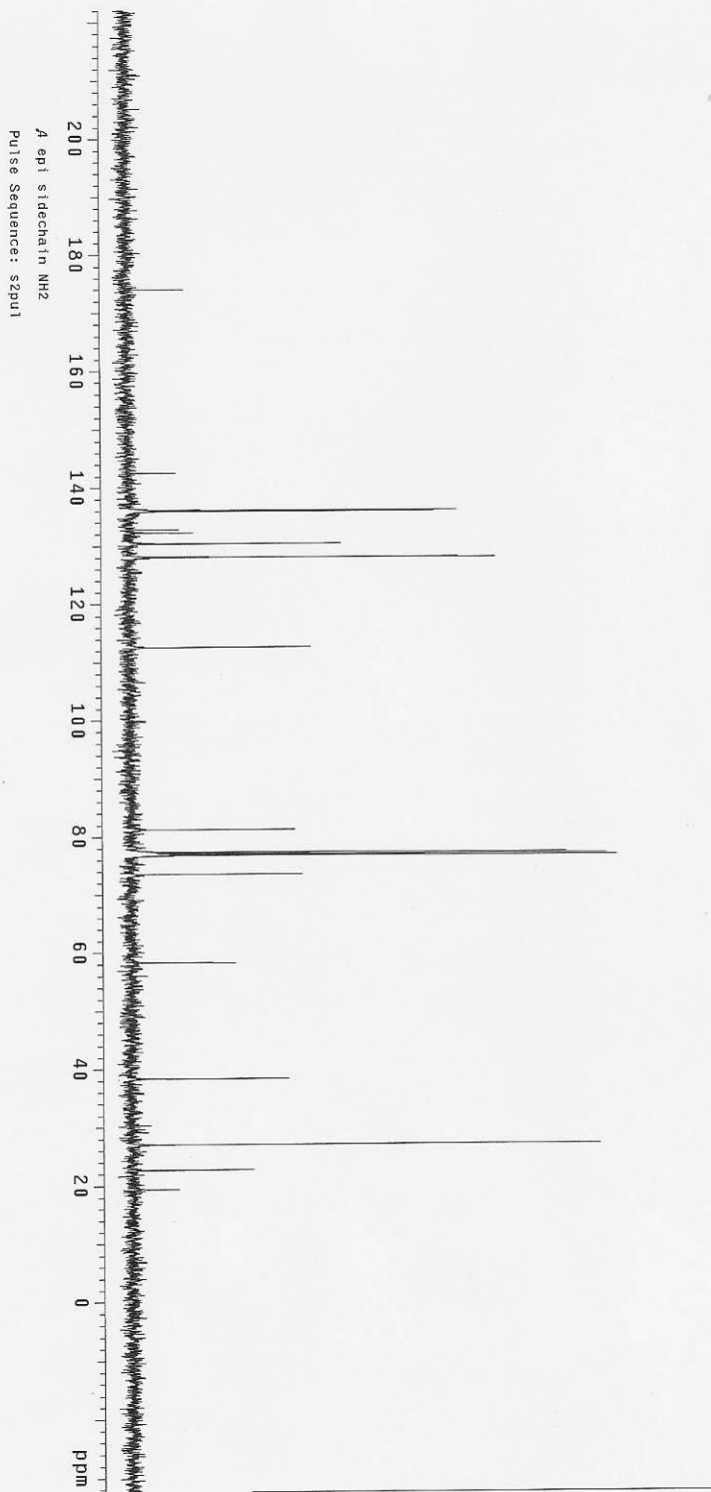

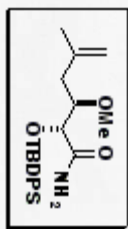

35

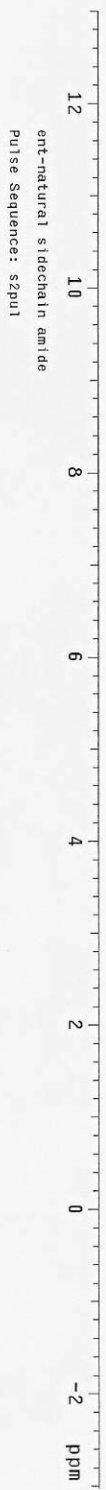

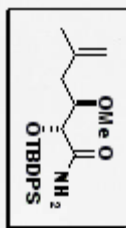

35

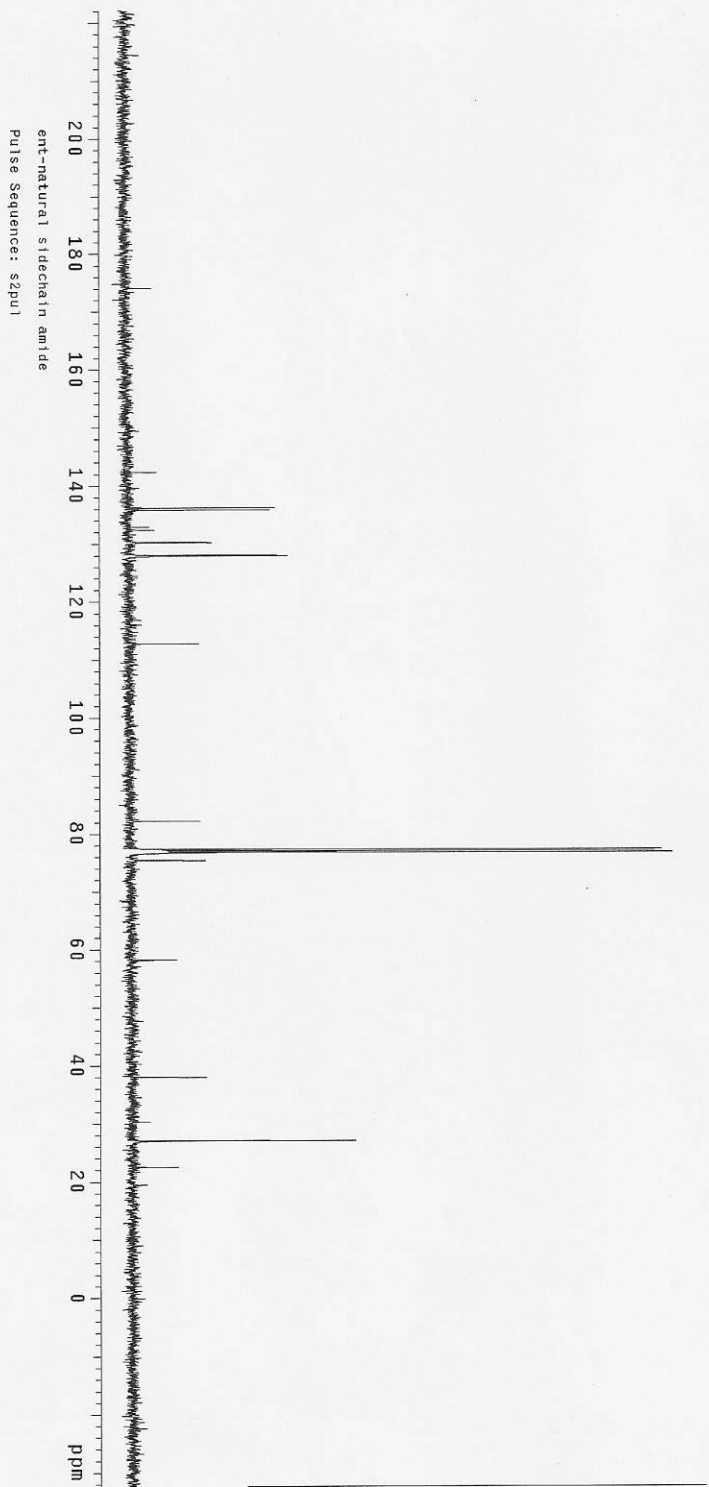







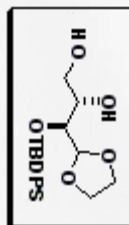

38

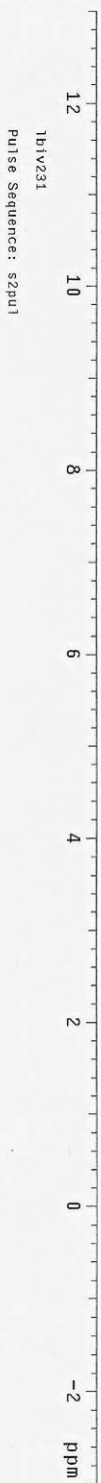

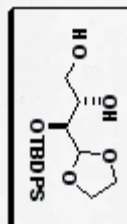

38

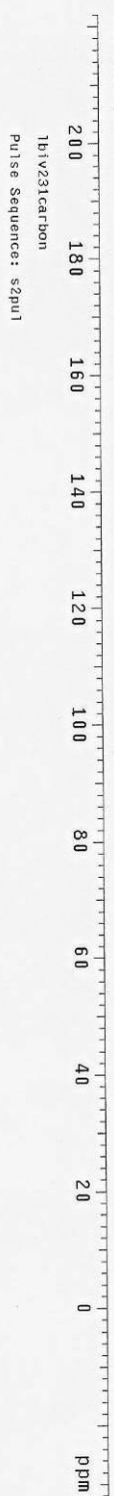

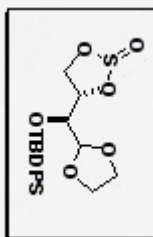

39

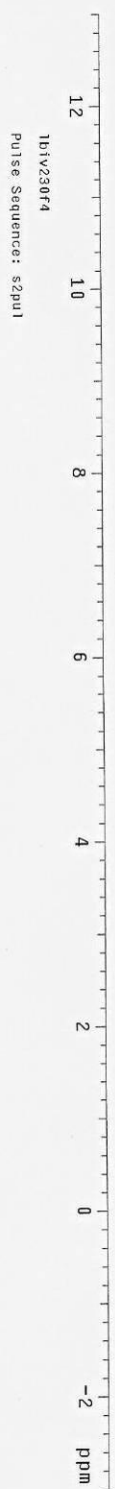

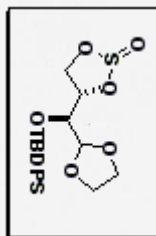

39

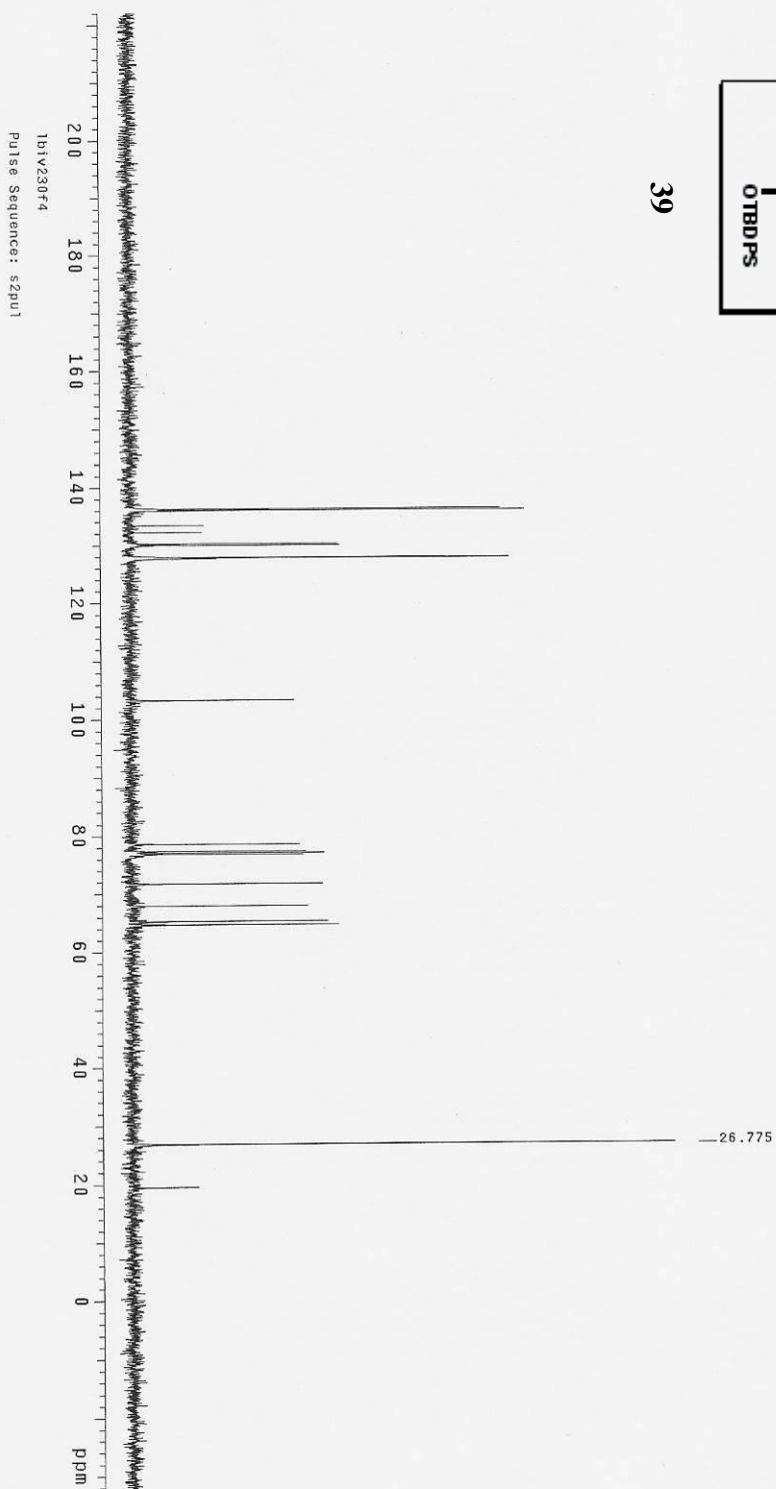

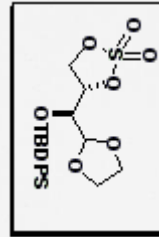

40

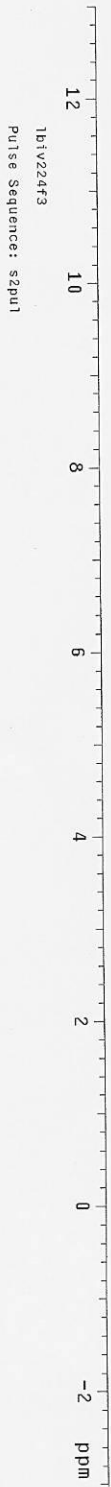

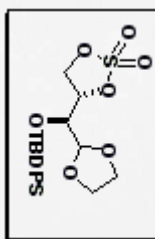

40

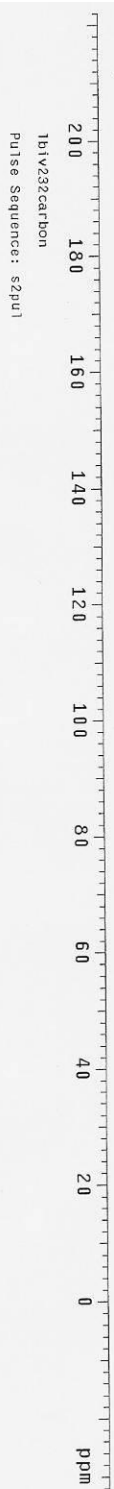

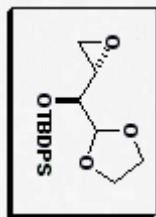

42

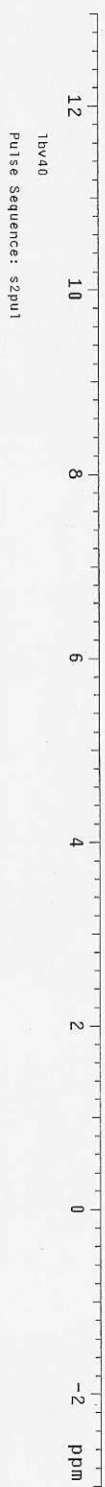



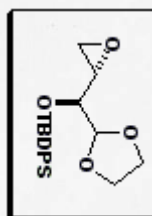

42

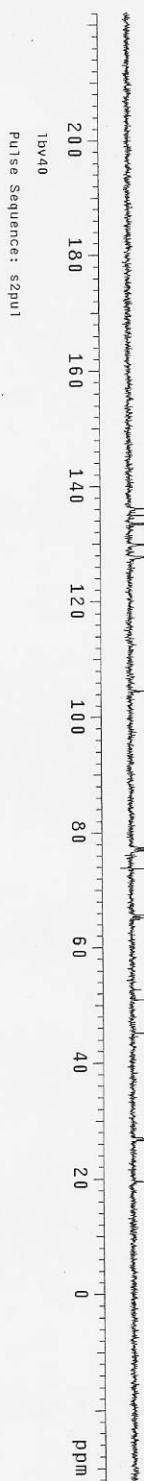

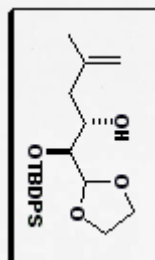

41

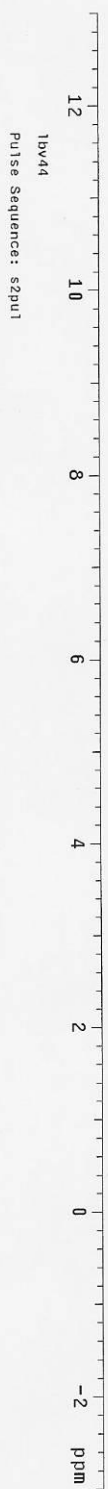

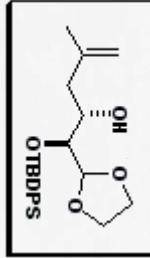

41

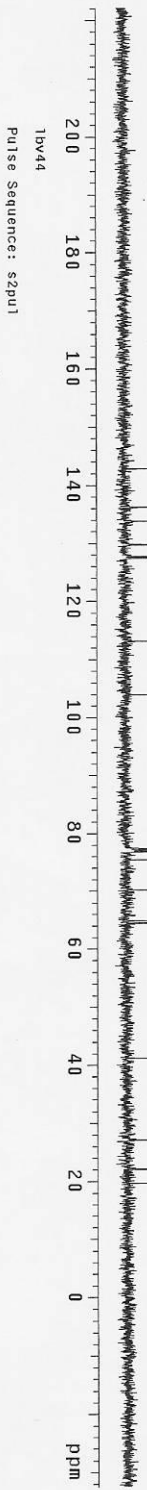

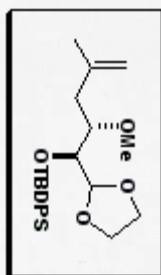

43

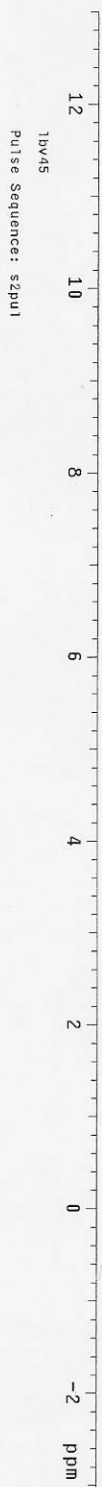

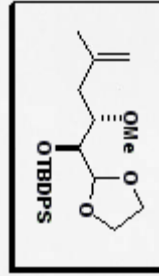

43

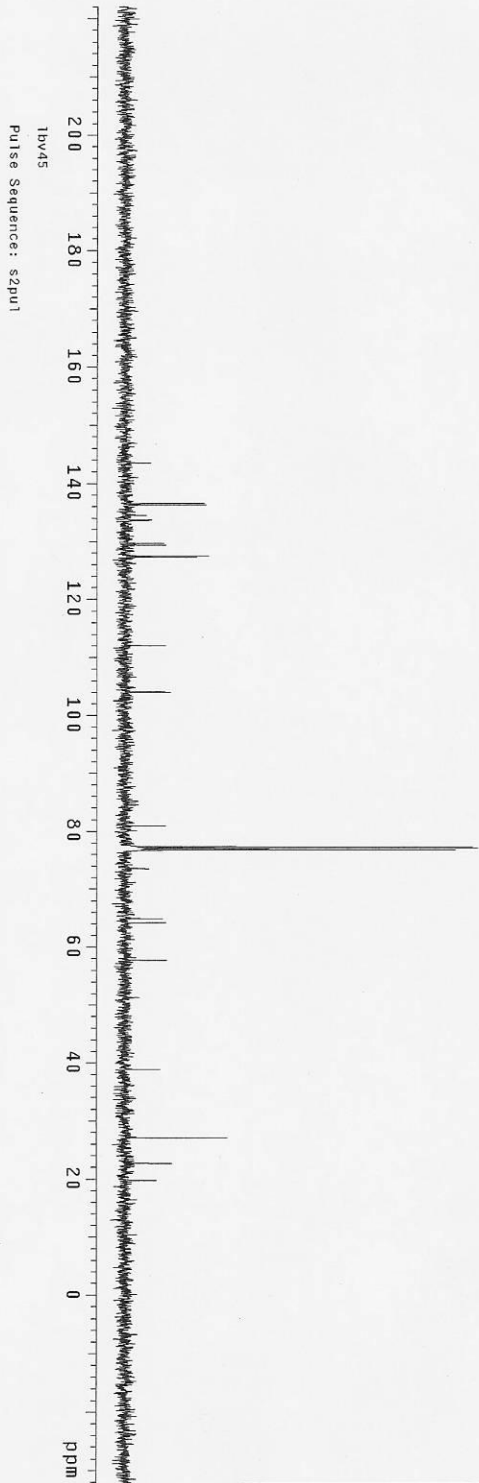

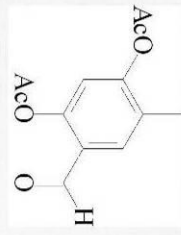

45

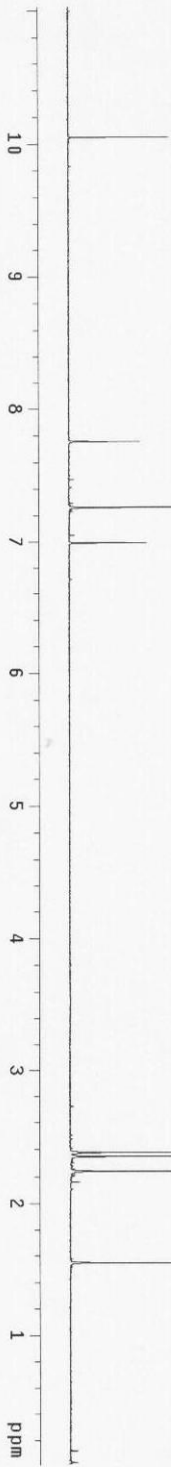

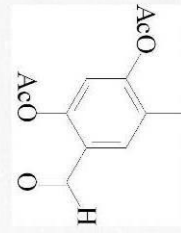

45

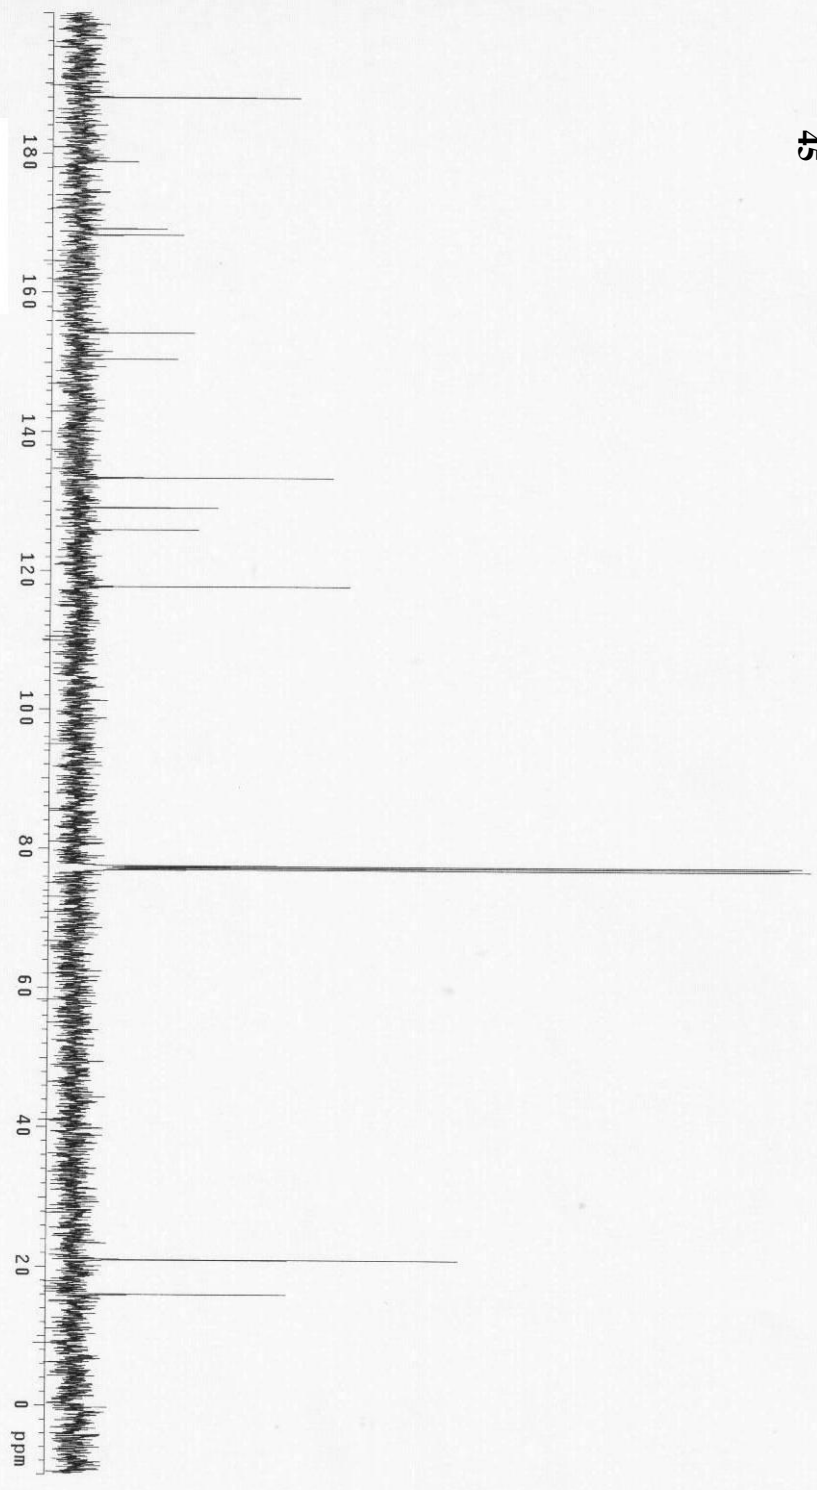

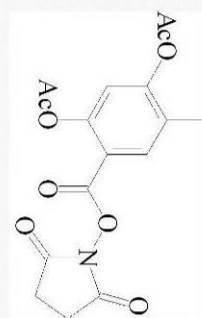

46

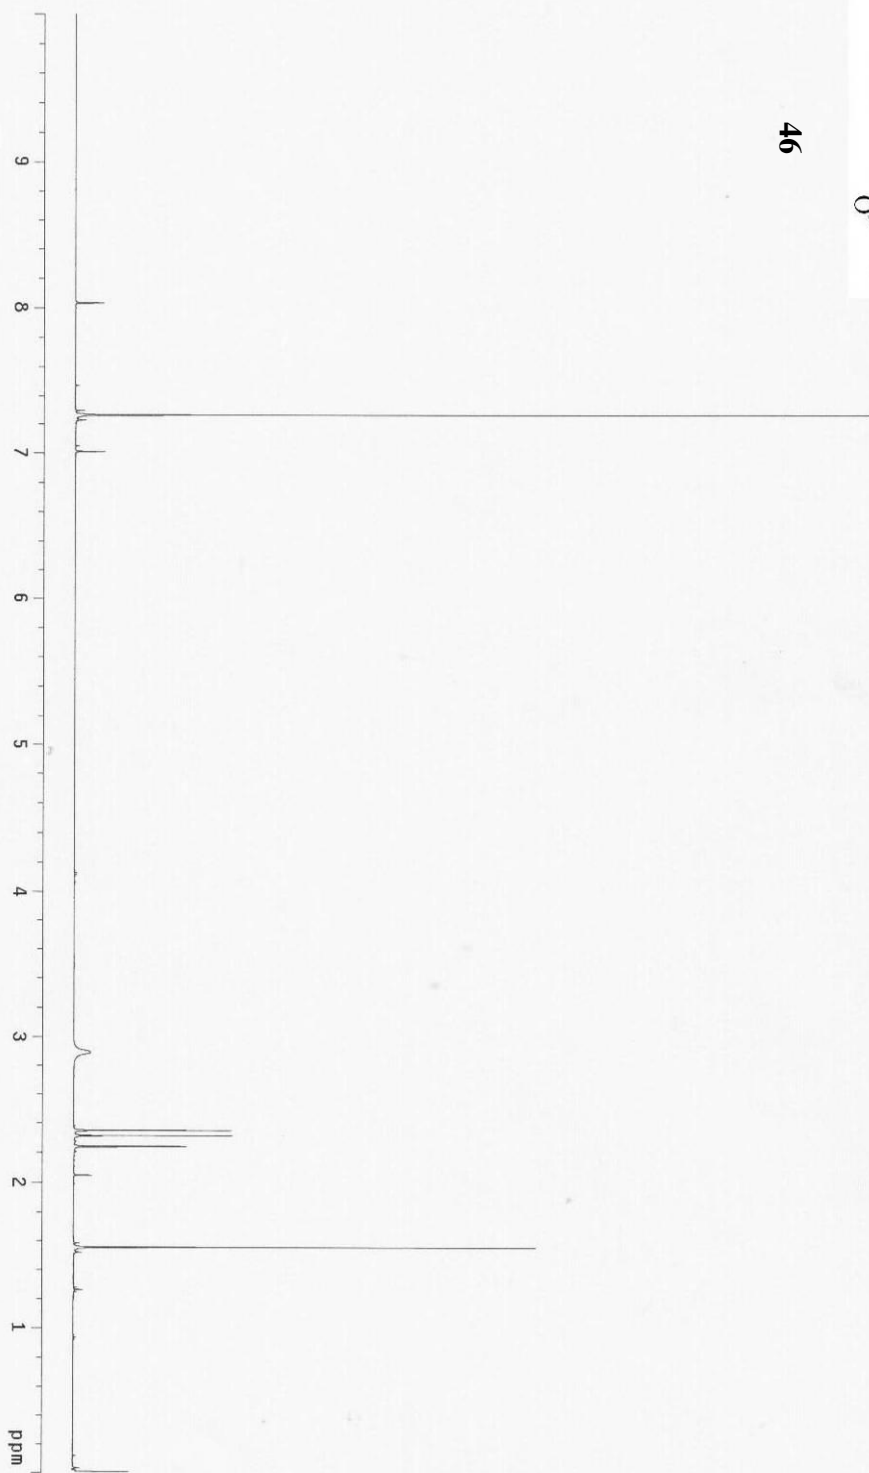





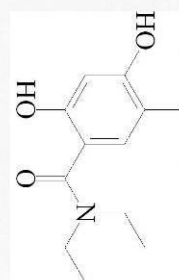

47

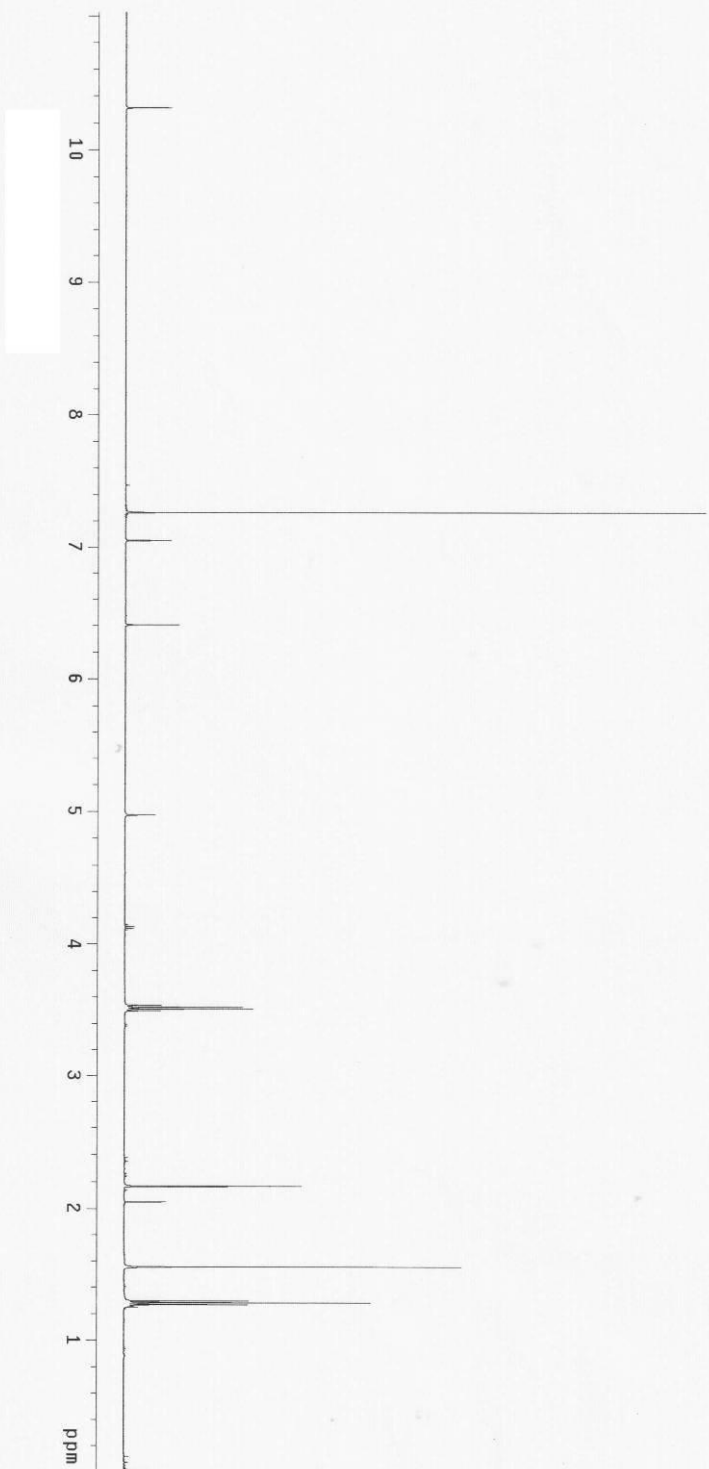

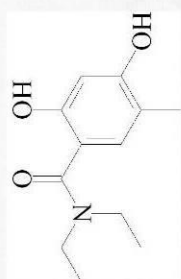

47

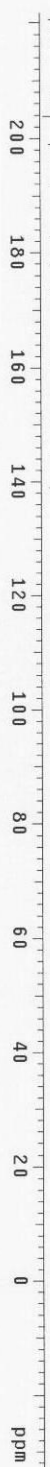

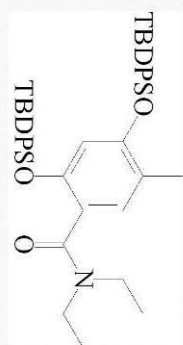

3

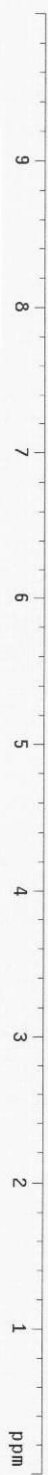

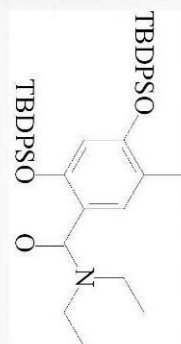

3

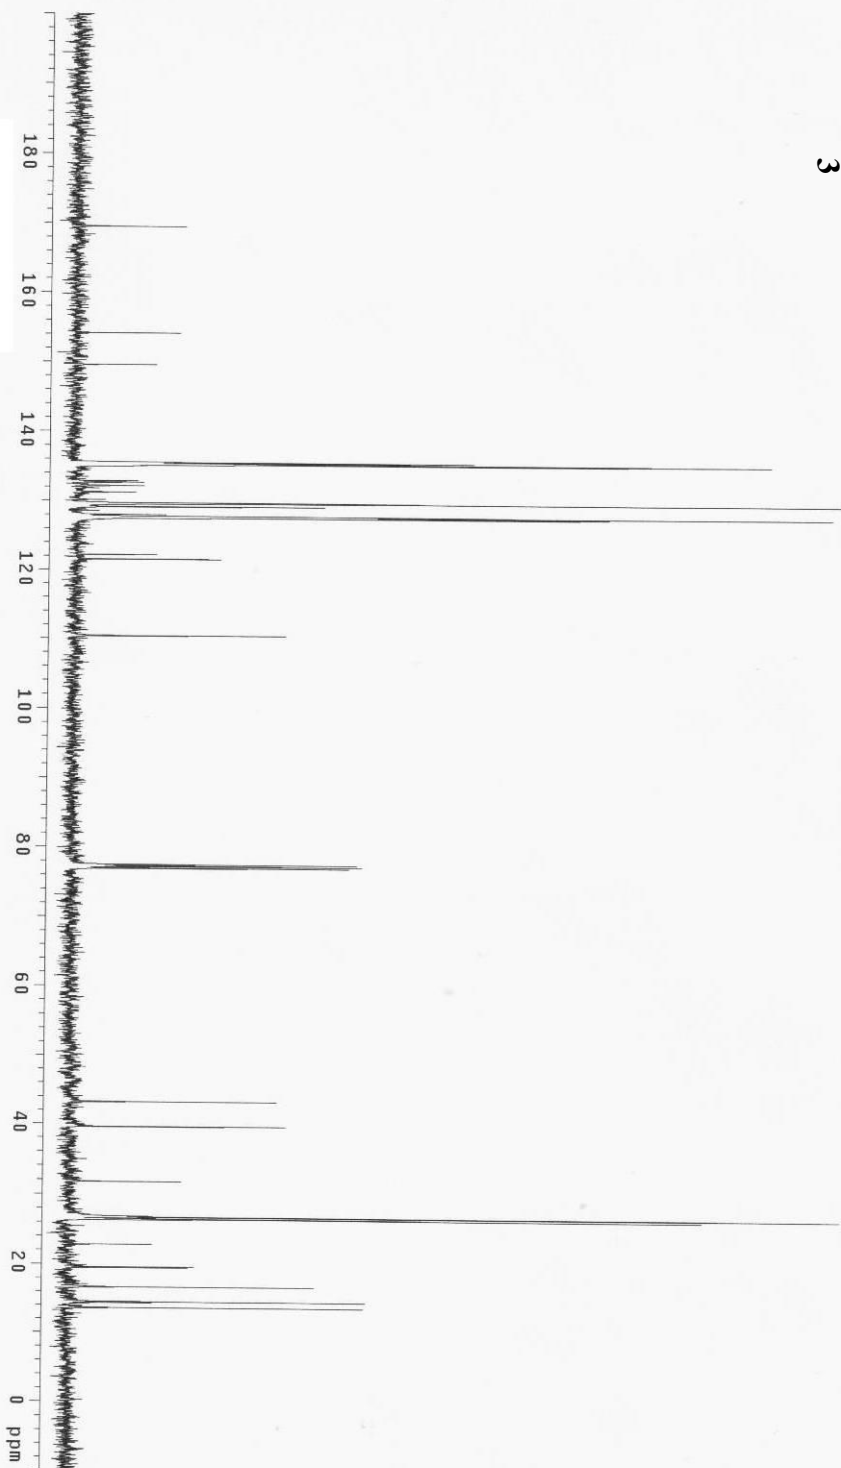

1D NOESY enhancement spectrum for S1

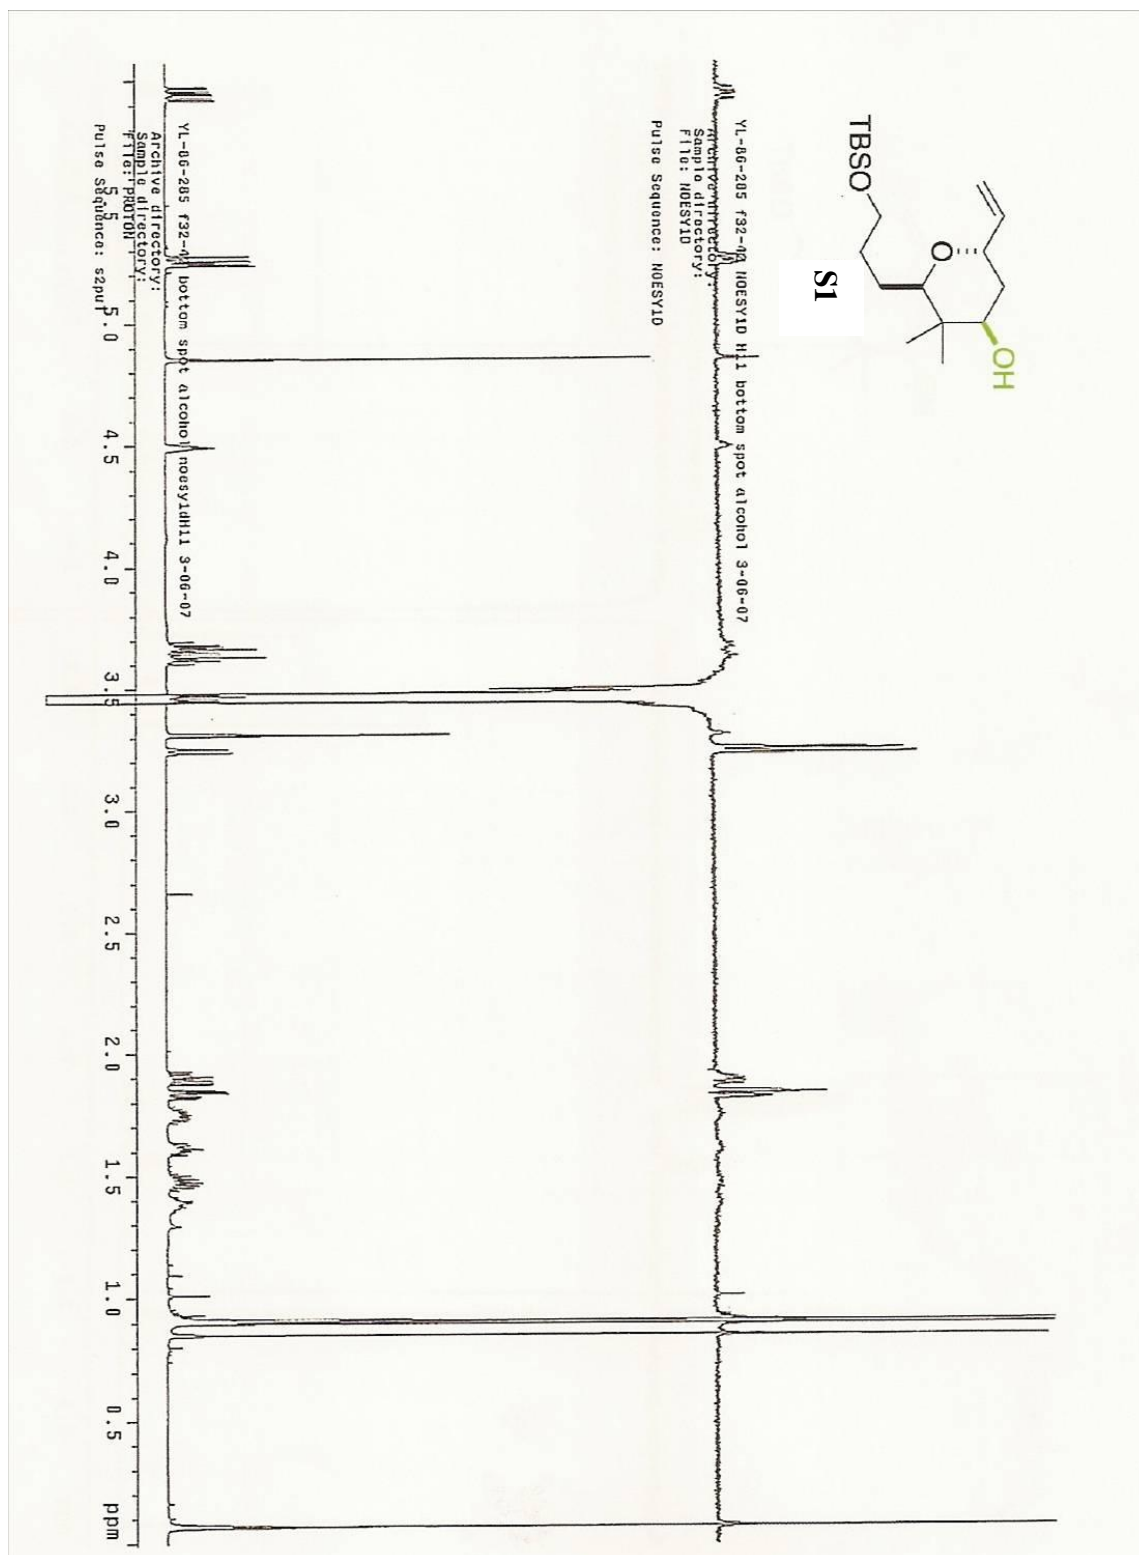

2D NOESY spectrum for S1

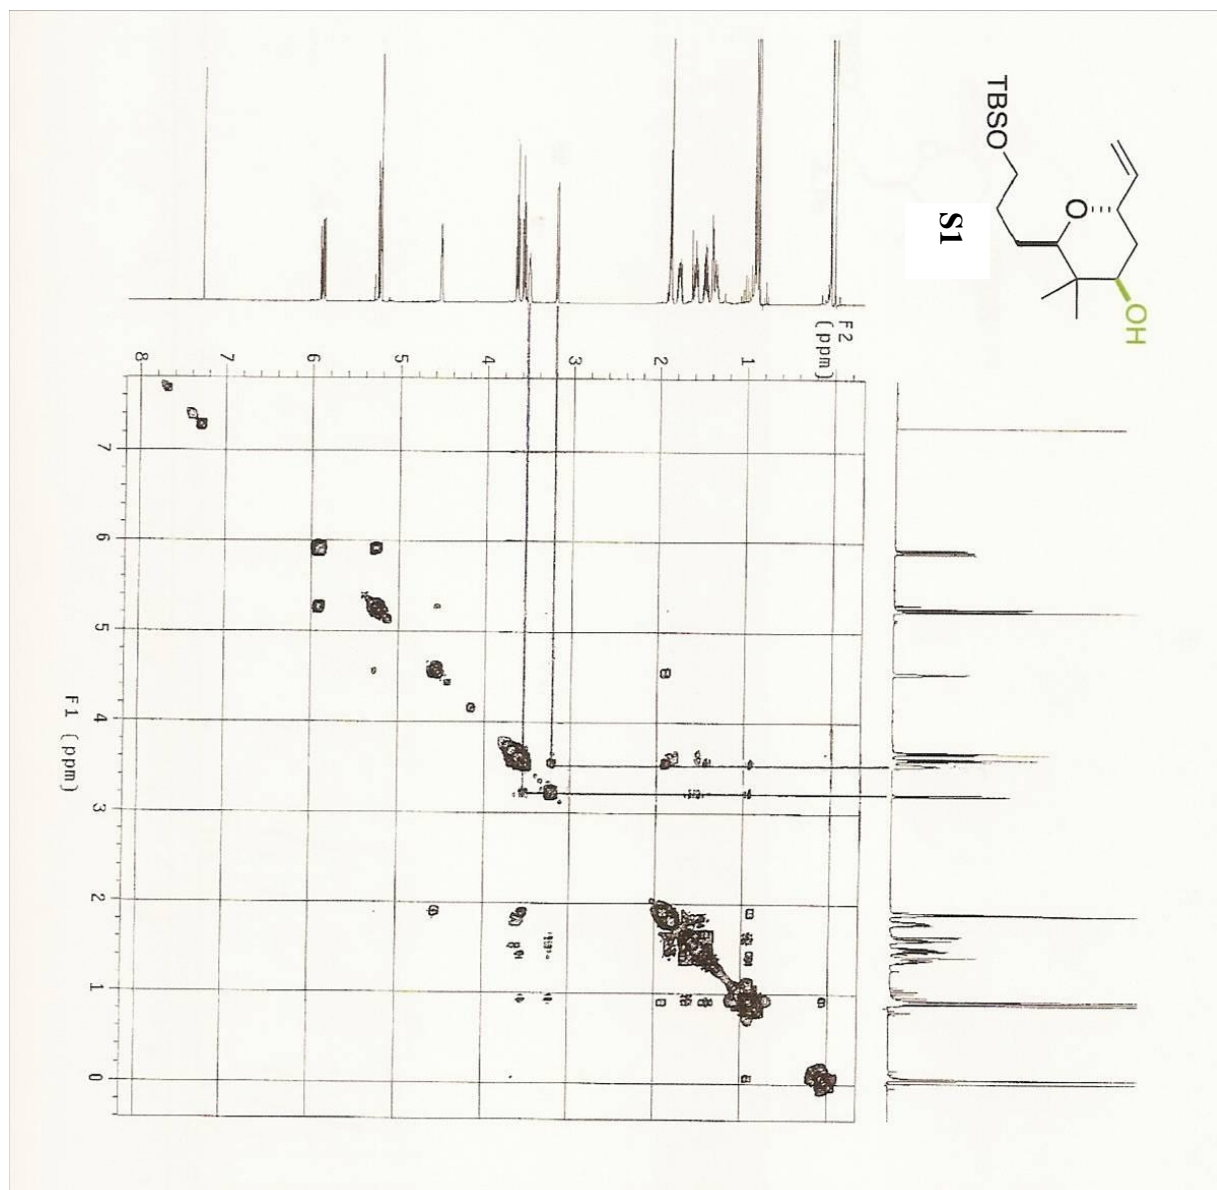





COSY Spectrum for **28**

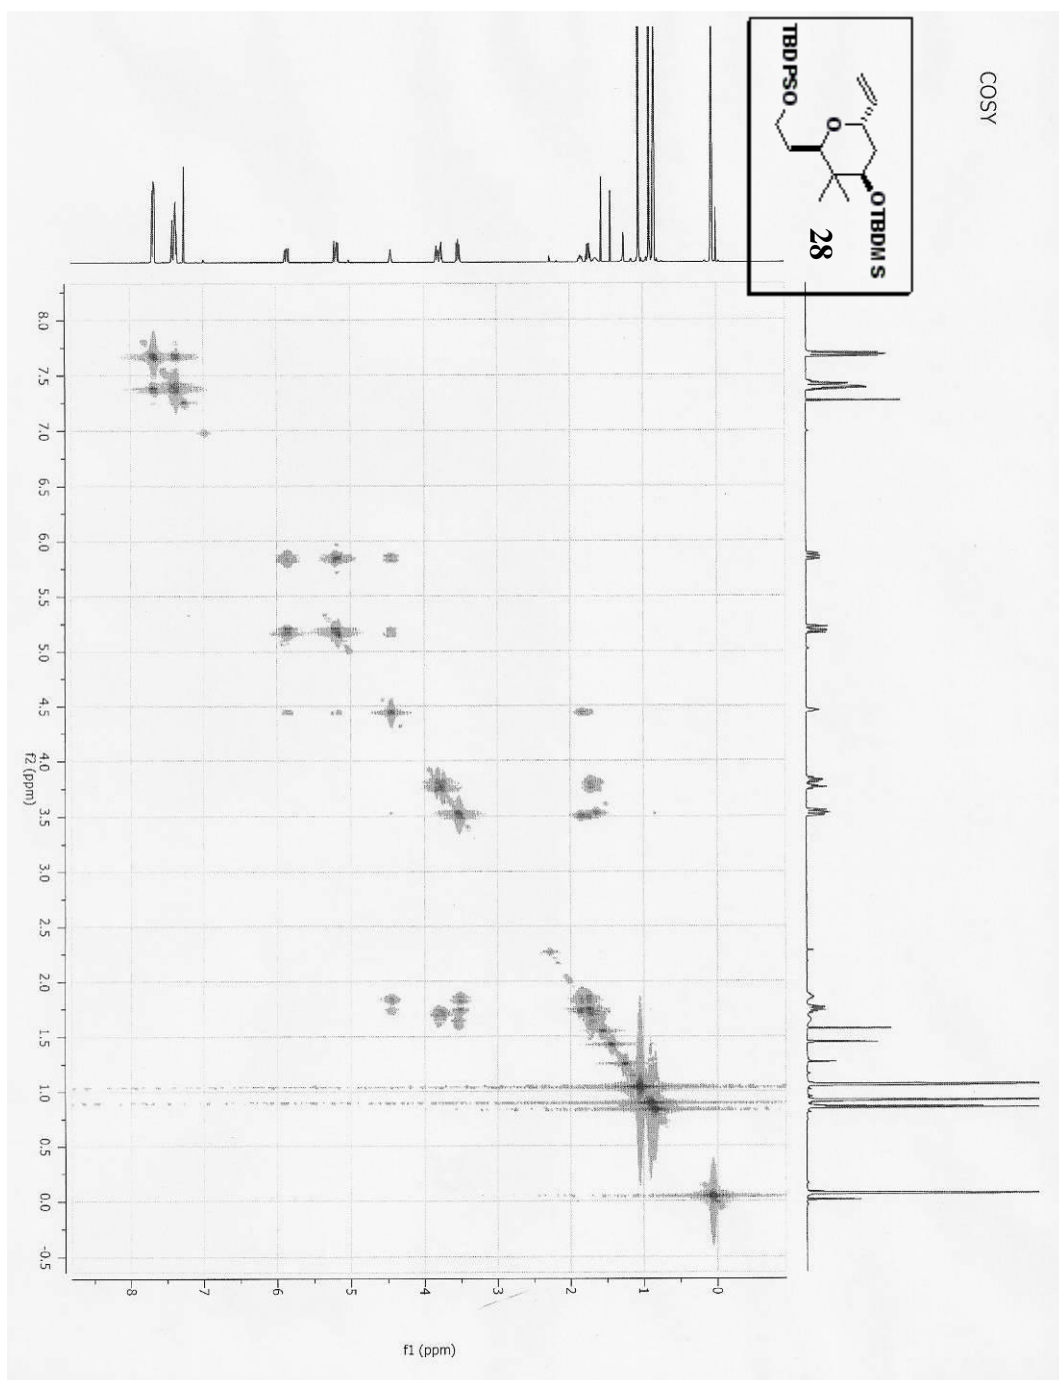



HMQC spectrum for **28**

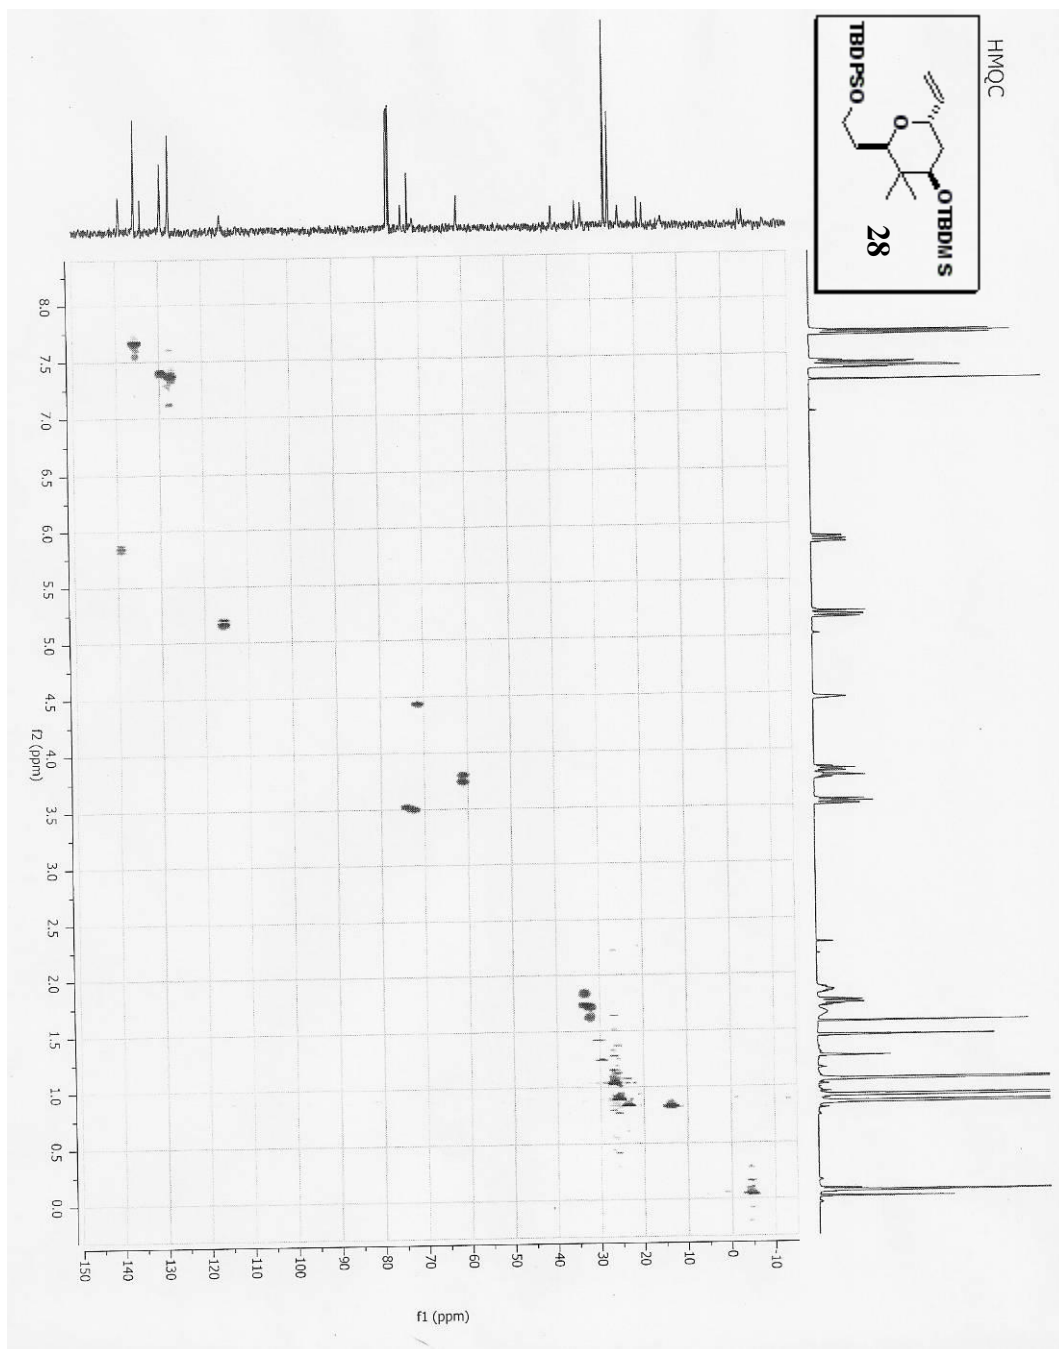

2D NOESY spectrum for **28**

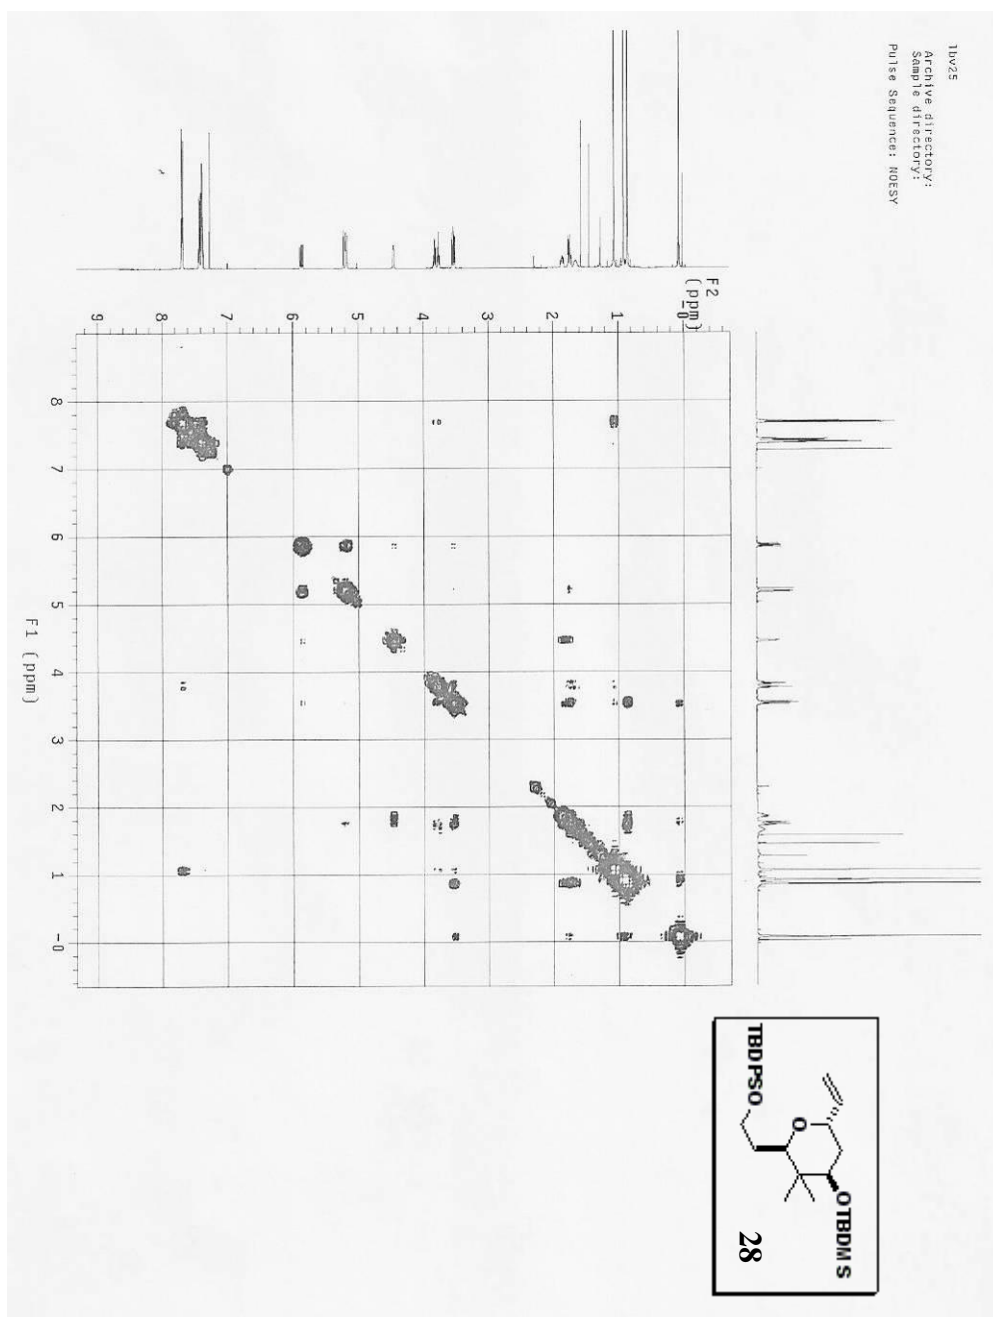

Supplement: NIHMS132551-supplement-3_si_003.pdf [file NIHMS132551-supplement-3_si_003.pdf]
